# Supplementary material for: Expression profiling of in vivo ductal carcinoma in situ progression models identified B cell lymphoma-9 as a molecular driver of breast cancer invasion
Source: PubMed Central journal article supplement (PMC4574212; doi:10.1186/s13058-015-0630-z), 2015-09-17
Supplement: 13058_2015_630_MOESM1_ESM.pdf [file 13058_2015_630_MOESM1_ESM.pdf]

|                               | Company          | Catalog # | Isotype |
|-------------------------------|------------------|-----------|---------|
| <b>IF staining</b>            |                  |           |         |
| Primary antibodies            |                  |           |         |
| BCL9                          | Abcam            | 37305     | Rabbit  |
| BCL9L                         | Abcam            | 113110    | Rabbit  |
| Cytokeratin 5                 | Vector           | VPC400    | Mouse   |
| Cytokeratin 19                | Thermoscientific | MS198     | Mouse   |
| SMA                           | Thermoscientific | PA5-18292 | Goat    |
| Phospho-histone3              | Abcam            | ab47297   | Rabbit  |
| Cleaved caspase 3             | Cell signaling   | 9664S     | Rabbit  |
| Secondary antibodies          |                  |           |         |
| Alexa Fluor 488 anti-rabbit   | Invitrogen       | A11008    | Goat    |
| Alexa Fluor 594 anti-mouse    | Invitrogen       | A21203    | Donkey  |
| Alexa Fluor 488 anti-mouse    | Invitrogen       | A11012    | Goat    |
| <b>Co-immunoprecipitation</b> |                  |           |         |
| IgG                           | Cell Signaling   | 2729S     | Rabbit  |
| BCL9                          | Santa Cruz       | sc-68915  | Rabbit  |
| <b>Western blot analysis</b>  |                  |           |         |
| BCL9                          | Abcam            | 37305     | Rabbit  |
| $\beta$ -catenin              | BD               | 610153    | Mouse   |
| $\beta$ -actin                | Chemicon         | MAB1501   | Mouse   |
| BCL9L                         | Abcam            | 113110    | Rabbit  |
| <b>FACS analysis</b>          |                  |           |         |
| Human CD44 (PE)-conjugated    | BD Pharmingen    | 555479    |         |
| Human CD24 (FITC)-conjugated! | BD Pharmingen    | 555427    |         |
