# Supplementary material for: Expression profiling of in vivo ductal carcinoma in situ progression models identified B cell lymphoma-9 as a molecular driver of breast cancer invasion
Source: PubMed Central journal article supplement (PMC4574212; doi:10.1186/s13058-015-0630-z), 2015-09-17

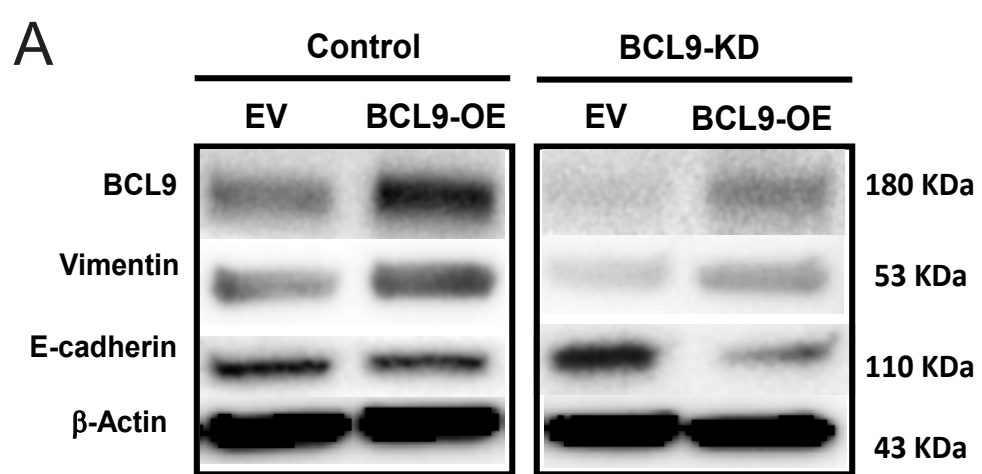

**B**

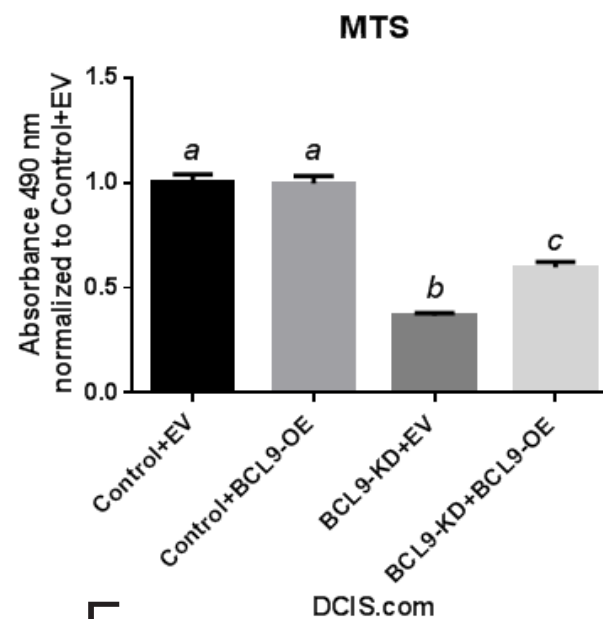

**C**

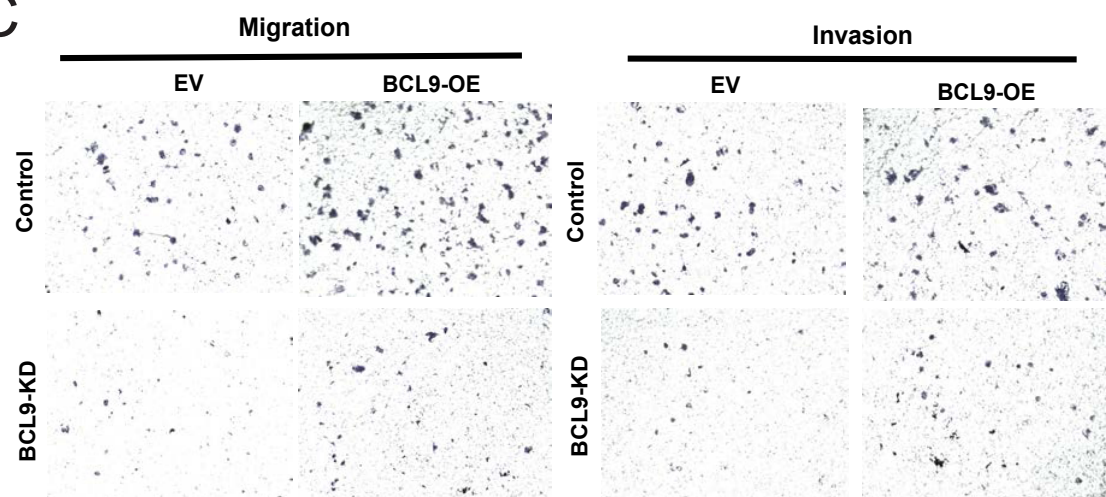

**D**

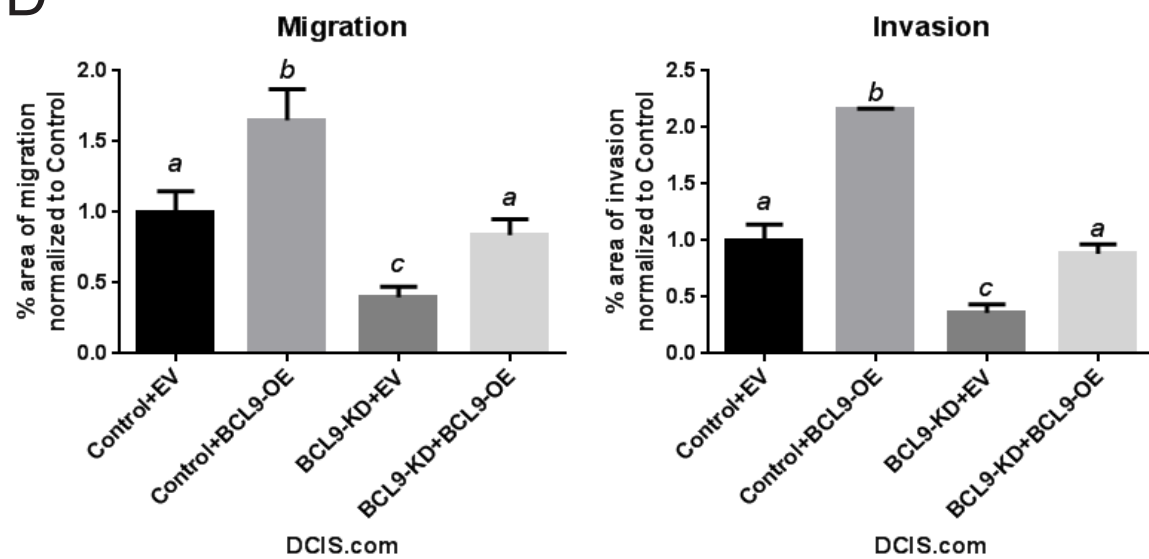

**E**

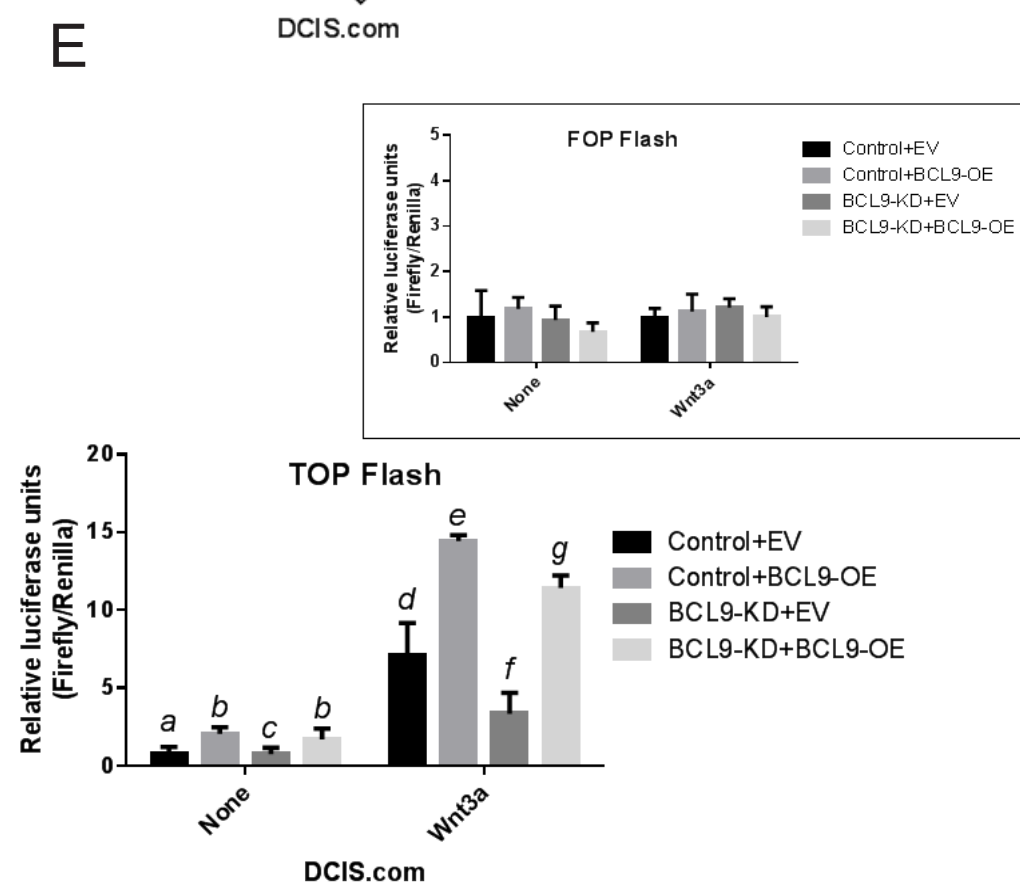

Supplement: 13058_2015_630_MOESM7_ESM.pdf [file 13058_2015_630_MOESM7_ESM.pdf]
