# Supplementary material for: Expression profiling of in vivo ductal carcinoma in situ progression models identified B cell lymphoma-9 as a molecular driver of breast cancer invasion
Source: PubMed Central journal article supplement (PMC4574212; doi:10.1186/s13058-015-0630-z), 2015-09-17

A.

### Breast Invasive Carcinoma (TCGA, Provisional; 959 samples)

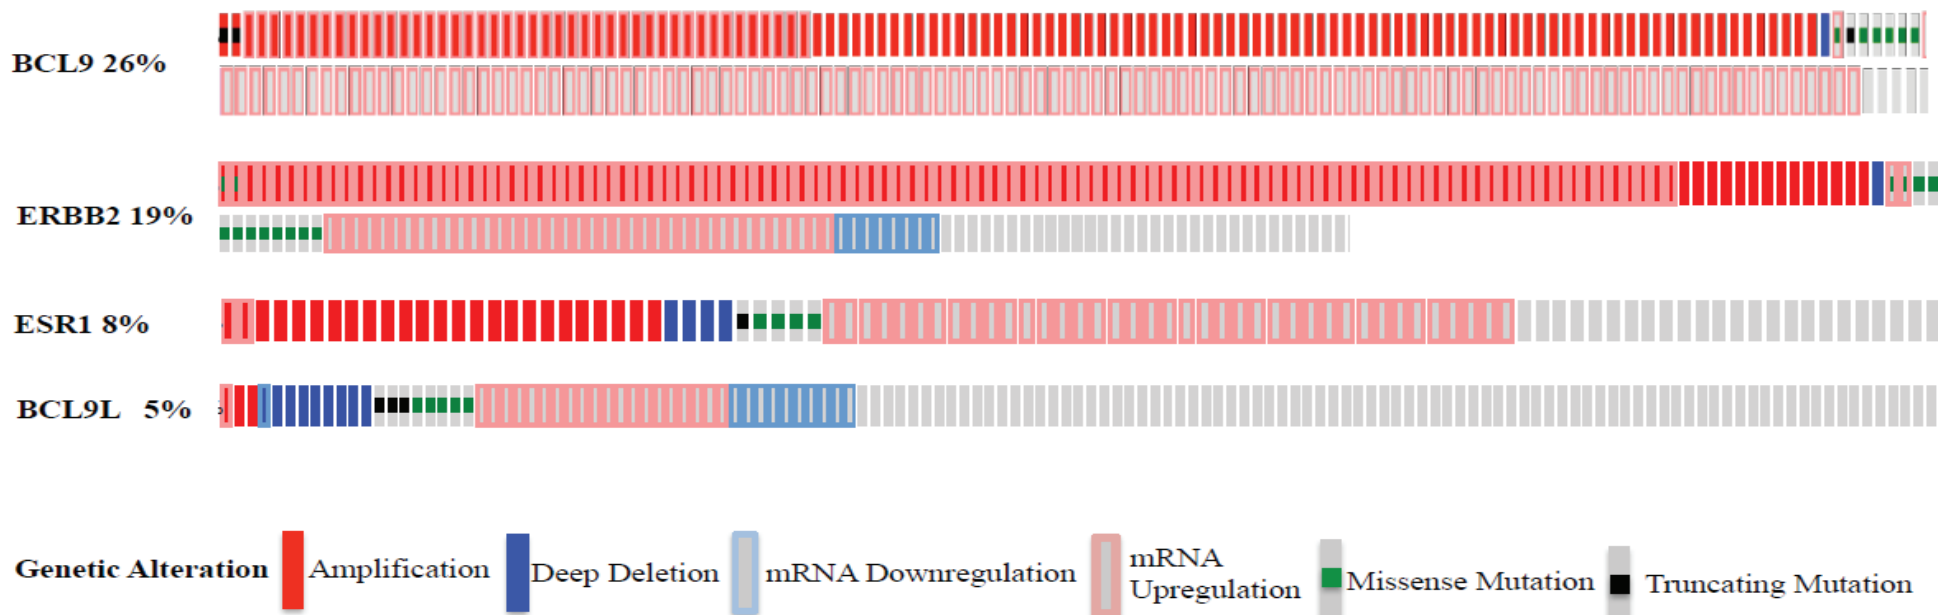

B.

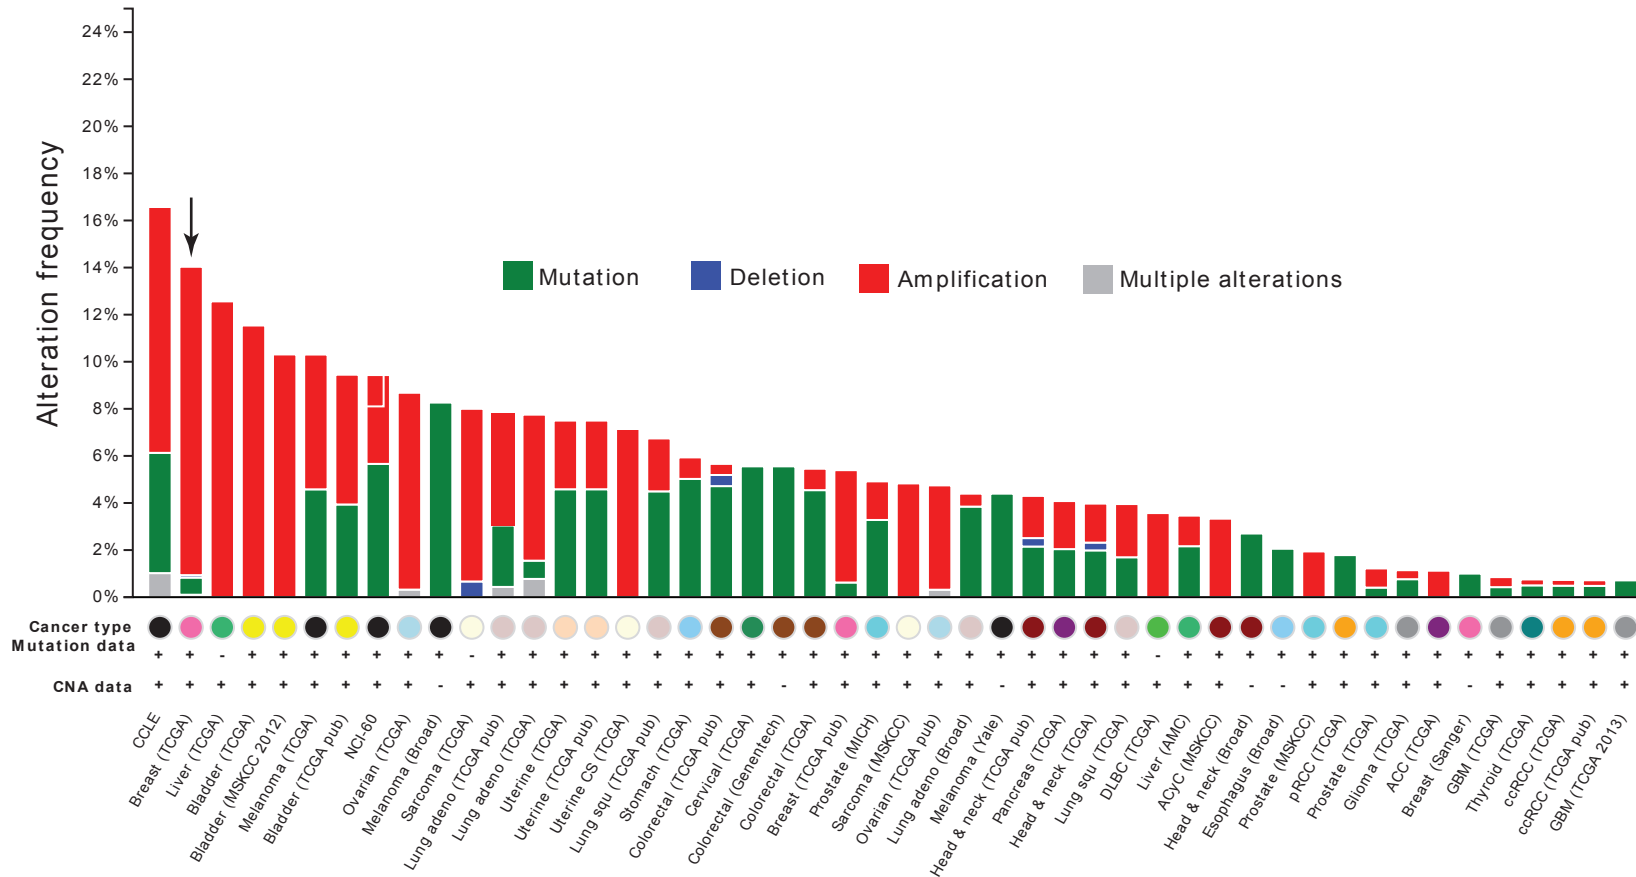

C.

|               | All tumors | Basal        | Luminal A  | Luminal B  | HER2 enriched |
|---------------|------------|--------------|------------|------------|---------------|
| No. Cases     | 825        | 81           | 235        | 133        | 58            |
| No. Amplified | 37         | 15           | 5          | 3          | 3             |
| % Amplified   | 4.5%       | 18.5%        | 2.1%       | 2.3%       | 5.2%          |
| 95% CI        | 3.2%, 6.1% | 10.8%, 28.7% | 0.7%, 4.9% | 0.5%, 6.5% | 1.1%, 14.4%   |

D.

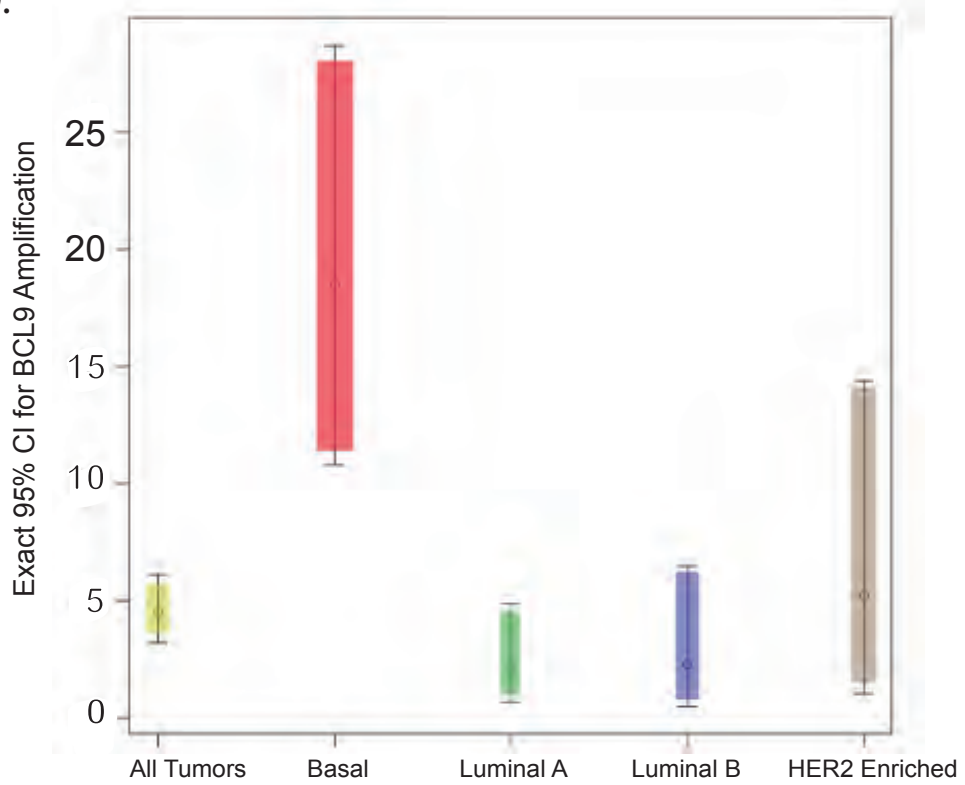

E.

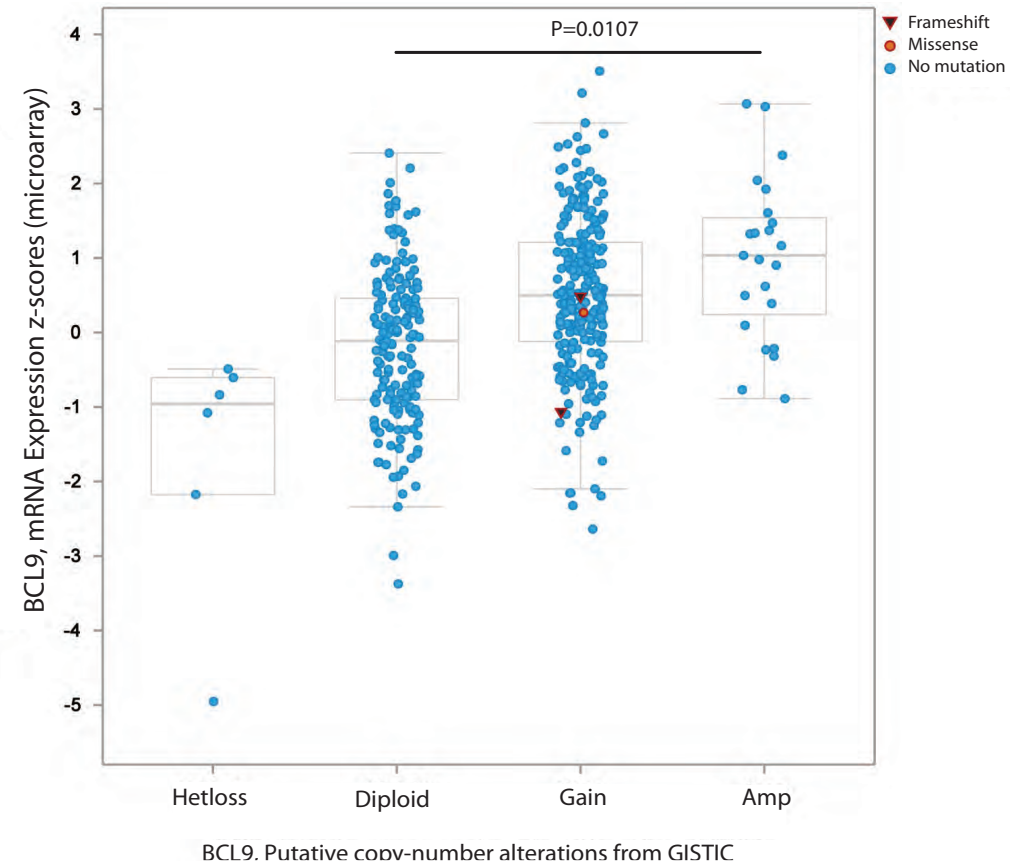

Supplement: 13058_2015_630_MOESM9_ESM.pdf [file 13058_2015_630_MOESM9_ESM.pdf]
