# Supplementary material for: Expression profiling of in vivo ductal carcinoma in situ progression models identified B cell lymphoma-9 as a molecular driver of breast cancer invasion
Source: Breast Cancer Res. 2015 Sep 17;17:128. doi: 10.1186/s13058-015-0630-z (PMC4574212; doi:10.1186/s13058-015-0630-z)
Supplement: Additional file 4: — Wnt-pathway-specific genes differentially expressed in ductal carcinoma in situ DCIS.COM and SUM225 mouse intraductal xenograft model (MIND) xenografts during transition from 2 to 6 weeks. Genes significantly differentially expressed between the 2- to 6-week time point in both DCIS.COM and SUM225 cell lines were further analyzed using Ingenuity Pathway Analysis® (IPA). The Wnt/β-catenin canonical pathway was identified as a significantly upregulated pathway in both cell line MIND xenografts during transition from 2 to 6 weeks. (XLS 48 kb) [file 13058_2015_630_MOESM4_ESM.xls]

## Sheet: DCIS 2v6 5% FDR
		1	1	1	2	2	2	Fold Change	q-value(%)
Probeset ID	Gene Symbol	DCIS2_1	DCIS2_2	DCIS2_3	DCIS6_1	DCIS6_2	DCIS6_3
203525_s_at	APC	8.27991	7.07057	7.67505	8.32337	8.52158	8.48564	2.18133	0
216933_x_at	APC	3.07829	2.8087	2.8512	3.1293	3.09909	3.15553	1.48668	0
204129_at	BCL9	7.11958	7.17073	7.01195	7.72319	7.57597	7.63844	1.86861	0
225756_at	CSNK1E	5.36321	6.37061	6.54788	7.02567	6.65575	6.98266	2.22065	0
223679_at	CTNNB1	7.2502	6.97811	7.49553	9.13438	9.3332	9.46065	5.37023	0
57532_at	DVL2	7.03201	6.54032	6.89003	7.42426	7.22465	7.56057	1.9175	0
201908_at	DVL3	8.6086	7.94002	8.09072	9.21552	9.05365	8.99763	2.35002	0
235195_at	FBXW2	4.36916	3.74687	3.63738	4.85905	4.8493	4.79223	2.41593	0
204451_at	FZD1	9.62538	8.15723	8.40766	10.1616	10.6557	10.6429	4.32739	0
204452_s_at	FZD1	5.44245	5.01596	4.90148	5.59337	5.80847	6.32478	2.21263	0
227499_at	FZD3	5.09778	4.75504	4.98768	4.90587	5.79142	5.89519	1.91965	0
225745_at	LRP6	8.72485	8.02498	8.58341	9.09454	9.18152	9.28301	2.14176	0
213456_at	SOSTDC1	10.2069	8.05875	7.95497	10.5376	10.7901	11.1613	5.45022	0
216035_x_at	TCF7L2	8.39259	8.1304	8.19768	8.27736	8.62909	8.59374	1.53336	0
212761_at	TCF7L2	10.8115	10.8164	11.0308	11.0852	11.4987	11.3174	1.70652	0
216037_x_at	TCF7L2	7.8594	7.61152	7.52047	7.74008	8.02837	8.14105	1.58325	0
229103_at	WNT3	3.61156	3.7551	4.23168	4.50261	4.1868	4.39251	1.80423	0
231227_at	WNT5A	3.18132	3.40929	3.39289	3.24075	3.58466	3.24882	1.30776	0
71933_at	WNT6	7.18723	7.58986	7.32728	6.44186	6.5839	6.28789	0.672037	0
226858_at	CSNK1E	9.01055	8.1782	8.5731	9.25429	8.84421	9.30459	1.87116	1.49343
241736_at	FBXW2	4.12675	4.28374	3.98446	4.03725	4.07035	4.07471	1.21923	1.49343
210220_at	FZD2	6.32206	6.23437	6.39375	6.30305	6.73069	6.22128	1.37408	1.49343
227524_at	FZD3	6.09762	5.65157	5.52715	6.03604	5.97145	5.86754	1.47061	1.49343
203987_at	FZD6	8.9426	7.82461	8.51158	8.97587	8.80654	9.32389	1.95345	1.49343
217681_at	LOC100289775 /// WNT7B	5.94883	6.1869	6.1954	6.52063	6.09047	6.06082	1.38554	1.49343
34697_at	LRP6	5.97163	5.80703	5.85298	5.92109	6.33078	5.70894	1.38183	1.49343
200816_s_at	PAFAH1B1	8.84396	8.00916	8.29254	8.71607	9.00514	8.63849	1.69529	1.49343
224022_x_at	WNT16	2.73102	2.63712	2.64041	2.603	2.69445	2.63164	1.25733	1.49343
222695_s_at	AXIN2	6.25995	6.50946	6.53808	5.74395	5.87667	5.71645	0.812279	1.92901
212850_s_at	LRP4	5.88875	6.26097	6.04346	5.28333	5.52533	5.31163	0.793273	1.92901
200815_s_at	PAFAH1B1	10.7191	10.7442	10.6525	9.82858	9.99409	9.43928	0.662306	1.92901
223537_s_at	WNT5B	6.03262	6.48405	6.34643	5.66457	5.64296	5.44441	0.78629	2.80584
203230_at	DVL1	8.15684	7.2348	7.79338	8.00181	7.99661	8.22599	1.62824	2.89352
203705_s_at	FZD7	9.67214	8.65003	9.10437	9.0648	9.90551	9.75747	1.72979	3.85802
211547_s_at	PAFAH1B1	5.45627	4.96936	4.94688	5.51214	5.02224	5.47202	1.48262	3.85802
206213_at	WNT10B	6.02979	6.34592	6.26195	5.89516	6.07942	5.95499	1.08736	3.85802
222696_at	AXIN2	4.70411	4.65187	4.60928	4.74506	4.56044	4.36019	1.19499	4.82253
222015_at	CSNK1E	7.67268	8.19288	7.86898	7.79366	7.70972	7.78223	1.15445	4.82253
204602_at	DKK1	10.2847	7.74138	8.42932	9.60711	9.58857	10.1145	2.47675	4.82253
219908_at	DKK2	2.75742	2.57099	2.45574	2.80447	2.5393	2.44859	1.28306	4.82253
221127_s_at	DKK3	2.71946	2.51038	2.63454	2.45906	2.51139	2.82072	1.25915	4.82253
219889_at	FRAT1	5.81325	5.32789	5.63651	5.40125	5.68078	5.79481	1.31032	4.82253
219683_at	FZD3	5.42517	4.88204	5.12872	5.16209	4.96739	5.45469	1.32525	4.82253
203706_s_at	FZD7	10.1585	9.34153	9.35686	9.53828	10.0591	9.79293	1.4486	4.82253
200813_s_at	PAFAH1B1	8.1043	7.85631	7.85026	8.2219	7.81323	7.77669	1.28091	4.82253
216511_s_at	TCF7L2	7.73908	6.99447	6.90404	7.08495	7.43876	7.63	1.44282	4.82253
212759_s_at	TCF7L2	7.09174	6.79548	6.7703	6.90653	6.74088	6.81879	1.22525	4.82253
1556689_a_at	WNT4	5.53288	5.5486	5.93769	5.69834	5.62654	5.43379	1.20582	4.82253

## Sheet: SUM 2v6 5% FDR
Probeset ID	Gene Symbol	SUM2_1	SUM2_2	SUM2_3	SUM6_1	SUM6_2	SUM6_3
		1	1	1	2	2	2	Fold Change	q-value(%)
203525_s_at	APC	8.50393	6.60935	4.76448	9.02178	8.78401	8.9488	6.0572	0
216933_x_at	APC	3.30032	2.62587	2.89477	3.52362	4.04296	3.68644	2.16905	0
204129_at	BCL9	7.19016	7.08705	7.42259	7.41731	7.27476	7.30266	1.3238	0
226858_at	CSNK1E	8.98568	7.80314	6.80653	9.66937	9.35069	9.30403	3.68744	0
225756_at	CSNK1E	5.22048	4.94941	5.16449	5.49924	5.43676	5.45226	1.57753	0
222015_at	CSNK1E	8.41855	8.6806	8.76126	8.42932	8.77033	8.64019	1.23073	0
223679_at	CTNNB1	5.46717	5.28388	5.65419	6.58901	6.6145	6.67998	2.76215	0
204602_at	DKK1	8.5938	4.73184	4.43875	10.2651	8.74129	8.31472	11.2507	0
230508_at	DKK3	3.79927	4.47267	4.62349	3.40837	3.49889	3.30293	0.664939	0
206619_at	DKK4	5.69728	6.39702	6.34488	4.9038	4.90077	4.93546	0.526069	0
203230_at	DVL1	7.92522	7.04351	5.71969	8.11211	7.98032	8.03135	2.73491	0
57532_at	DVL2	6.9047	6.49586	6.60385	7.53948	7.3041	7.5254	2.13548	0
201908_at	DVL3	8.13227	5.15178	5.0564	8.70907	8.66482	8.85208	7.64693	0
235195_at	FBXW2	4.24349	3.20732	3.34123	5.28485	4.87333	5.23406	3.57954	0
241736_at	FBXW2	4.0258	4.48493	4.52633	3.65966	3.64583	3.64727	0.76398	0
219889_at	FRAT1	5.88257	5.71139	6.16843	6.09838	6.12871	6.15445	1.42677	0
204451_at	FZD1	9.16689	6.94228	6.04499	9.72405	9.46776	9.76014	5.94758	0
204452_s_at	FZD1	5.36384	5.52004	5.80955	5.94614	5.82343	5.92021	1.5567	0
227499_at	FZD3	3.98319	3.82973	4.18106	4.4877	4.12557	4.65816	1.66116	0
219683_at	FZD3	4.88735	4.77449	4.80798	5.36414	5.09864	5.27985	1.65938	0
203987_at	FZD6	9.40828	6.07159	4.4619	10.1752	9.81745	10.1178	12.9595	0
203705_s_at	FZD7	5.41833	5.1408	4.72926	6.37148	5.76865	5.97896	2.37832	0
203706_s_at	FZD7	5.14124	3.68885	3.96385	6.26794	5.73283	6.2778	4.3911	0
229591_at	LRP5	6.24048	6.68361	6.82244	5.41406	5.61143	5.22988	0.551967	0
225745_at	LRP6	7.15048	5.94143	5.56951	8.1608	8.06851	8.30712	4.80558	0
232201_at	NKD2	6.27974	6.52078	6.78285	5.5366	5.76585	5.64242	0.672158	0
200816_s_at	PAFAH1B1	7.54513	7.00664	6.80769	8.08526	7.80119	7.91318	2.17311	0
200815_s_at	PAFAH1B1	10.4791	10.708	11.406	9.61039	9.8487	9.56204	0.541757	0
205578_at	ROR2	3.72655	4.01654	4.0441	3.83381	3.94237	4.45986	1.37172	0
241450_at	RSPO1	6.16656	6.70048	6.794	5.51364	5.81101	5.855	0.697006	0
237423_at	RSPO4	5.84993	6.68878	6.68169	5.11603	5.32429	5.36987	0.562388	0
213456_at	SOSTDC1	4.83712	5.66331	4.40442	6.92761	6.87092	7.69018	5.66075	0
212761_at	TCF7L2	9.48611	7.80785	5.59983	9.85975	9.70901	9.54739	5.20715	0
206459_s_at	WNT2B	5.61889	6.21045	6.60481	5.11382	5.27954	5.05169	0.619857	0
213425_at	WNT5A	5.00322	4.77512	4.22308	6.01317	5.58521	5.65851	2.62357	0
223537_s_at	WNT5B	6.20816	6.77876	6.83496	5.60914	5.76241	5.50438	0.626067	0
71933_at	WNT6	7.21497	7.96076	8.29186	6.4809	6.79552	6.56437	0.534937	0
221609_s_at	WNT6	6.40442	6.38543	7.03695	7.41843	6.92272	7.35045	1.9026	0
210248_at	WNT7A	5.93789	6.43596	6.6576	5.50567	5.48671	5.41029	0.67367	0
224498_x_at	AXIN2	6.06804	6.78959	7.05594	5.71511	5.87932	5.86743	0.701802	1.39918
224176_s_at	AXIN2	6.4165	7.07206	7.58265	5.68396	6.10712	6.18445	0.604779	1.39918
222695_s_at	AXIN2	5.94416	7.10227	7.0896	5.66744	5.97897	5.60038	0.634325	1.39918
222696_at	AXIN2	6.37584	5.21042	5.68414	6.47276	5.97982	6.8979	1.99963	1.39918
234943_at	CSNK1E /// LOC400927	6.51454	7.17837	7.22531	6.12623	6.3402	6.09187	0.716845	1.39918
218941_at	FBXW2	7.43505	8.09972	8.58138	6.94307	7.19722	7.06477	0.63113	1.39918
206136_at	FZD5	5.38876	6.07674	6.37356	5.23978	5.21486	4.94748	0.704201	1.39918
207639_at	FZD9	5.62846	6.06712	6.64169	5.1905	5.26997	4.84244	0.613408	1.39918
212850_s_at	LRP4	5.72506	6.58451	7.03561	5.18833	5.60498	5.47059	0.606795	1.39918
209468_at	LRP5	5.2995	5.95046	6.49544	5.08151	4.86631	5.1107	0.664687	1.39918
205606_at	LRP6	6.85029	7.7971	7.59243	6.68648	6.62037	6.5376	0.710998	1.39918
239666_at	PYGO2	6.06896	6.58983	6.89014	5.61825	6.03234	5.58576	0.724729	1.39918
212762_s_at	TCF7L2	7.8202	6.10475	4.79252	7.65237	7.72526	7.75777	3.43192	1.39918
223709_s_at	WNT10A	5.48207	6.10652	6.62216	5.14321	5.18326	5.2242	0.668815	1.39918
206213_at	WNT10B	6.41153	7.36953	7.09753	6.19959	6.16984	5.93313	0.681931	1.39918
221113_s_at	WNT16	6.70726	7.41681	7.75196	6.22262	6.52128	6.47543	0.669338	1.39918
205648_at	WNT2	5.13852	5.67082	5.99674	4.8169	4.88295	4.77031	0.720831	1.39918
230751_at	WNT4	6.31398	7.05218	7.4036	5.95912	6.13933	6.12159	0.686089	1.39918
221029_s_at	WNT5B	5.51555	5.68489	6.03335	5.19002	4.95547	4.84378	0.736215	1.39918
1560752_at	FBXW2	3.957	4.5529	4.94063	3.76367	3.73982	3.74662	0.743755	1.49912
211547_s_at	PAFAH1B1	4.79889	4.43137	4.78689	5.20697	4.54214	5.00926	1.46759	1.49912
228186_s_at	RSPO3	3.58096	4.14179	4.81061	3.24129	3.40612	3.38218	0.693411	1.49912
1556689_a_at	WNT4	5.76651	6.30017	6.31539	5.34912	5.67925	5.44727	0.796031	1.49912
222086_s_at	WNT6	4.61304	4.90758	5.3695	4.44341	4.03023	4.25898	0.751168	1.49912
205990_s_at	WNT5A	7.32921	5.98538	5.43593	7.40851	6.85181	6.90451	2.16017	1.96759
216037_x_at	TCF7L2	7.26106	6.6942	7.12457	7.45376	7.03236	7.13457	1.4012	2.69841
214247_s_at	DKK3	3.76369	4.46713	4.38542	3.65961	3.63398	3.49554	0.810754	2.73752
206737_at	WNT11	5.60591	6.14976	6.73129	5.38701	5.43264	5.48503	0.746879	2.73752
221455_s_at	WNT3	4.78731	5.32824	5.99482	4.58768	4.68828	4.58334	0.735102	2.73752
231743_at	WNT3	6.0466	6.70581	6.87255	5.97639	5.95388	5.7932	0.79694	2.73752
238105_x_at	WNT7B	7.02218	7.7946	8.22649	6.96362	6.89891	6.88624	0.727763	2.73752
221126_at	DKK3	2.72344	3.86654	3.49262	2.73757	2.75866	2.62047	0.785168	3.88128
217681_at	LOC100289775 /// WNT7B	6.16517	6.84591	6.89494	6.18011	6.0937	5.94663	0.837705	3.88128
1553115_at	NKD1	5.71768	6.14375	6.75489	5.48448	5.60705	5.61382	0.795197	3.88128
200813_s_at	PAFAH1B1	7.50166	7.03813	7.53156	7.69883	7.30375	7.38775	1.33117	3.88128
216511_s_at	TCF7L2	7.04605	7.45739	6.53832	7.31587	7.08713	7.19379	1.40579	3.88128
1554012_at	RSPO2	2.53955	2.9569	3.00298	2.32932	2.47173	2.35183	0.905963	4.0885
236094_at	TCF7L2	6.2824	6.89971	7.19043	6.21305	6.32442	6.1848	0.844567	4.0885
