# Supplementary material for: Expression profiling of in vivo ductal carcinoma in situ progression models identified B cell lymphoma-9 as a molecular driver of breast cancer invasion
Source: Breast Cancer Res. 2015 Sep 17;17:128. doi: 10.1186/s13058-015-0630-z (PMC4574212; doi:10.1186/s13058-015-0630-z)
Supplement: Additional file 10: — Analysis of The Cancer Genome Atlas (TCGA) data showing canonical Wnt pathways genes expressed in BCL9-high versus BCL9-low tumors. TCGA breast cancer samples with BCL9 levels above the range defined by normal samples were labeled upregulated in cancer (414 samples). The significant differentially expressed genes from TCGA analysis of BCL9-high versus BCL9-low tumors were analyzed in Ingenuity Pathway Analysis (IPA) and the canonical pathways with a p value ≤0.05 were obtained. (XLS 124 kb) [file 13058_2015_630_MOESM10_ESM.xls]

## Sheet: Sheet0
© 2000-2015 QIAGEN. All rights reserved.
Ingenuity Canonical Pathways	-log(p-value)	Ratio	z-score	Molecules
Antigen Presentation Pathway	1.4E01	6.76E-01		HLA-DQA2,HLA-DQA1,NLRC5,TAP1,HLA-F,HLA-DRB1,HLA-DMA,HLA-DRB5,HLA-DMB,HLA-DPA1,CIITA,HLA-DPB1,HLA-E,HLA-DOA,CD74,B2M,HLA-DRA,CALR,HLA-A,TAP2,HLA-C,HLA-B,MR1,PSMB9,PSMB8
EIF2 Signaling	9.36E00	2.97E-01	-5.568	EIF3G,RPL13A,RPL32,MRAS,PIK3R5,RPS24,RPL28,RPL37A,RPLP1,RPS5,RPL27,RPS12,RPS13,RPL8,PIK3CD,RPS11,RPS8,RPL30,RPL39,RPS6,RPL11,RPLP2,RPL35,RPS7,FAU,RPS16,RPS9,RPL36,EIF3K,RPS27A,RPS15,RPL27A,RPL9,UBA52,RPS10,RPS26,RPS20,RPL38,RPS29,RPL37,RPL22L1,RPL4,RPS21,RPLP0,RPL18A,RPL13,RPSA,RPS3,RPS19,RPL18,RPS17,MAP2K2,RPL36AL,RPS28,HRAS
Mitochondrial Dysfunction	9.27E00	3.04E-01		TRAK1,UQCR10,COX5A,NDUFB7,UQCRH,NDUFA7,NDUFS5,SDHC,NDUFS3,ATP5E,COX4I1,PARK7,NDUFS7,MAPK12,NDUFB8,CYCS,VPS9D1,UQCR11,CYC1,SOD2,PRDX5,COX6A1,NDUFA11,NDUFS6,LRRK2,NDUFB2,UQCRB,NDUFB9,COX7A1,NDUFA4L2,APH1A,NDUFA13,COX7A2,ATP5L,GPX4,COX6B1,NDUFA6,NDUFS8,HSD17B10,ATP5G1,NDUFV1,COX5B,ATP5I,ATP5D,NCSTN,NDUFS2,MAP2K4,PSEN2,ATP5J2,COX8A,NDUFB11,GPD2
Oxidative Phosphorylation	8.79E00	3.49E-01		NDUFB9,COX7A1,UQCR10,COX5A,NDUFB7,NDUFA13,COX7A2,ATP5L,COX6B1,UQCRH,NDUFA7,NDUFA6,NDUFS5,NDUFS8,SDHC,NDUFS3,ATP5E,COX4I1,ATP5G1,NDUFS7,NDUFB8,NDUFV1,COX5B,ATP5I,CYCS,ATP5D,VPS9D1,UQCR11,CYC1,NDUFS2,COX6A1,NDUFA11,NDUFS6,ATP5J2,COX8A,NDUFB11,UQCRB,NDUFB2
Leukocyte Extravasation Signaling	6.5E00	2.58E-01	-3.893	ITGAL,SIPA1,NCF1,CLDN8,PIK3R5,ITGB2,NCF2,WAS,PIK3CD,PRKCB,MAPK11,NCF4,MAPK12,CLDN12,CLDN15,VAV1,MMP3,SELPLG,CYBB,CYBA,PECAM1,MMP1,MMP16,F11R,MMP9,ITGA2,WIPF1,CLDN1,RAC2,VCAM1,ICAM3,CLDN5,ACTG2,VAV3,SPN,RAPGEF4,CD99,ARHGAP35,BTK,MMP13,PLCG2,MMP7,MYL6,MMP19,PRKCA,MAP2K4,MAP2K2,ARHGAP4,TIMP1,MMP24,ARHGAP9
mTOR Signaling	6.44E00	2.61E-01	-3.128	EIF3G,MRAS,PLD3,PIK3R5,RPS24,RPS5,RPS12,RPS13,RPS6KA5,PIK3CD,PPP2R5A,RPS11,PRKCB,VEGFC,RND3,RPS8,RPS6,DDIT4,RPS7,FAU,GNB1L,RPS16,RPS9,EIF3K,RPS27A,RHOU,RPS15,PRKAB2,RPS10,RPS26,PGF,PPP2R3B,IRS1,RPS20,RPS29,RPS21,PRR5,EIF4EBP1,RPS6KB2,HMOX1,RPSA,RPS3,RPS19,PRKCA,RPS17,PRKAA2,RPS28,HRAS,RHOF
Pathogenesis of Multiple Sclerosis	6.31E00	8.89E-01		CXCL11,CXCL9,CCR5,CCL3,CCL5,CCR1,CXCL10,CCL4
Crosstalk between Dendritic Cells and Natural Killer Cells	6.16E00	3.26E-01		CCR7,MICB,ITGAL,IL2RB,IL15RA,CD40,HLA-F,IL2RG,CD83,HLA-DRB1,TYROBP,ICAM3,HLA-DRB5,CD86,ACTG2,FSCN1,LTB,HLA-E,TNFRSF1B,CSF2RB,CD69,HLA-DRA,IL3RA,IL18,HLA-A,TLR3,TNFSF10,HLA-C,HLA-B
Granulocyte Adhesion and Diapedesis	6.05E00	2.6E-01		CXCL9,ITGAL,MMP9,ITGA2,CLDN8,ITGB2,SELE,CLDN1,VCAM1,CX3CL1,CXCL11,C5AR1,CCL14,CLDN5,CCL4,IL33,ICAM2,CCL3,CCL5,CXCL10,TNFRSF1B,CD99,SDC2,C5,CLDN12,CLDN15,MMP13,CCL21,MMP7,HSPB1,CCL19,MMP3,IL18,CKLF,CXCL17,MMP19,SELP,CXCL13,CCL2,SELPLG,CXCL14,MMP1,PECAM1,FPR3,MMP24,MMP16
CD28 Signaling in T Helper Cells	5.71E00	2.88E-01		HLA-DQA1,CALML5,PIK3R5,FCER1G,NFKBIE,ARPC1B,CARD11,LCP2,WAS,FYN,HLA-DRB1,PIK3CD,HLA-DMA,LCK,CD3D,HLA-DRB5,HLA-DMB,NFKBIB,CD4,PTPN6,LAT,CD86,CD3E,HLA-DOA,HLA-DQB1,PAK1,MAPK12,VAV1,HLA-DRA,MAP2K4,CSK,MAP3K1,MAP2K2,PTPRC
Agranulocyte Adhesion and Diapedesis	5.58E00	2.49E-01		CXCL9,MMP9,ITGA2,CLDN8,ITGB2,SELE,CLDN1,VCAM1,ITGB7,CX3CL1,CXCL11,C5AR1,CCL14,CLDN5,CCL4,ACTG2,IL33,ICAM2,CCL3,CCL5,CXCL10,CD99,C5,CLDN12,MYL6B,MYH10,CLDN15,MYL9,MMP13,CCL21,MMP7,MYL6,CCL19,MMP3,IL18,CKLF,CXCL17,MMP19,SELP,CXCL13,CCL2,SELPLG,CXCL14,MMP1,PECAM1,MMP24,MMP16
Dendritic Cell Maturation	5.51E00	2.51E-01		CCR7,FCGR1B,PLCB2,HLA-DQA1,FCGR1A,PIK3R5,PLCE1,FCER1G,NFKBIE,CD40,CD83,IRF8,HLA-DRB1,PIK3CD,HLA-DMA,TYROBP,HLA-DRB5,HLA-DMB,NFKBIB,CREBBP,MAPK11,PLCL1,TLR2,CD86,IL33,FSCN1,LTB,PLCB1,IL32,HLA-DOA,HLA-DQB1,TNFRSF1B,MAPK12,B2M,HLA-DRA,PLCG2,IL18,HLA-A,FCGR2B,ATF4,TLR3,CREB3L4,MAP2K4,HLA-C,HLA-B
Role of NFAT in Regulation of the Immune Response	5.3E00	2.51E-01	-4.426	FCGR1B,PLCB2,HLA-DQA1,FCGR1A,GNG11,MRAS,CALML5,PIK3R5,FCER1G,NFKBIE,LCP2,FYN,HLA-DRB1,PIK3CD,HLA-DMA,LCK,CD3D,HLA-DRB5,HLA-DMB,NFKBIB,CD4,LAT,MEF2D,CSNK1G1,CD79A,ORAI1,CD86,AKAP5,PLCB1,CD3E,HLA-DOA,HLA-DQB1,BTK,HLA-DRA,PLCG2,GNB1L,FCGR2B,MAP2K2,GNG12,GNG2,HRAS,GNA15,LYN
PKCθ Signaling in T Lymphocytes	5.25E00	2.8E-01	-3.656	HLA-DQA1,MRAS,PIK3R5,FCER1G,NFKBIE,RAC2,CARD11,LCP2,FYN,HLA-DRB1,PIK3CD,HLA-DMA,LCK,CD3D,RAC3,MAP3K8,HLA-DRB5,HLA-DMB,NFKBIB,CD4,LAT,CD86,VAV3,CD3E,HLA-DOA,HLA-DQB1,VAV1,HLA-DRA,MAP3K9,PLCG2,MAP2K4,MAP3K1,HRAS
Cdc42 Signaling	5.19E00	2.51E-01	-0.894	CDC42BPA,HLA-DQA2,PARD6A,HLA-DQA1,ITGA2,WIPF1,FCER1G,ARPC1B,HLA-F,APC,EXOC6,WAS,HLA-DRB1,CFL1,ARHGEF6,HLA-DMA,CD3D,HLA-DRB5,HLA-DMB,HLA-DPA1,MAPK11,IQGAP2,HLA-DPB1,CD3E,HLA-E,HLA-DOA,HLA-DQB1,PAK1,MAPK12,CDC42SE1,EXOC8,MYL6B,B2M,MYL9,VAV1,HLA-DRA,MYL6,HLA-A,MAP2K4,HLA-C,HLA-B,RASA1
Complement System	4.74E00	4.05E-01	-1.732	CFB,CFI,CD46,C1QB,C5,C7,ITGAX,ITGB2,C1R,C1QA,C1QC,C4A/C4B,C2,C5AR1,CFD
Regulation of eIF4 and p70S6K Signaling	4.73E00	2.53E-01	-1.265	EIF3G,RPS10,RPS26,MRAS,ITGA2,PIK3R5,RPS24,PPP2R3B,IRS1,RPS5,RPS20,RPS12,RPS13,PIK3CD,PPP2R5A,RPS29,RPS11,MAPK11,RPS21,EIF4EBP1,RPS8,RPS6,MAPK12,RPS7,FAU,RPS3,RPS19,RPSA,RPS16,RPS9,RPS17,MAP2K2,RPS28,EIF3K,RPS27A,HRAS,RPS15
OX40 Signaling Pathway	4.63E00	2.92E-01	1.667	HLA-DQA2,HLA-DQA1,FCER1G,NFKBIE,HLA-F,HLA-DRB1,HLA-DMA,CD3D,HLA-DRB5,HLA-DMB,NFKBIB,HLA-DPA1,CD4,HLA-DPB1,CD3E,HLA-E,HLA-DOA,HLA-DQB1,MAPK12,B2M,HLA-DRA,TRAF5,HLA-A,MAP2K4,HLA-C,HLA-B
B Cell Development	4.56E00	4.12E-01		SPN,HLA-DOA,HLA-DQA1,HLA-DQB1,CD40,HLA-DRA,HLA-DRB1,HLA-DMA,IL7R,HLA-DRB5,HLA-DMB,PTPRC,CD79A,CD86
Colorectal Cancer Metastasis Signaling	4.49E00	2.2E-01	-2.021	TLR5,TGFB1,GNG11,MRAS,JAK3,PIK3R5,PRKACB,ADCY1,PIK3CD,PRKAR1B,VEGFC,TLR2,RND3,PRKAR2A,MAPK12,LEF1,BIRC5,TGFB2,PTGER4,BAD,GNB1L,EGF,MMP3,MYC,GNG12,BAX,RHOU,MMP1,MMP16,MMP9,WNT5A,PGF,APC,ARRB1,E2F4,ADCY5,WNT7B,WNT5B,MMP13,DVL1,IL6ST,MMP7,TLR3,MMP19,MAP2K4,MAP2K2,FZD8,GNG2,HRAS,RHOF,MMP24,ADCY9
Primary Immunodeficiency Signaling	4.46E00	3.46E-01		ADA,CD3E,RFXANK,BTK,JAK3,CD40,TAP1,IL2RG,RFX5,CD8A,TAP2,CD3D,IL7R,LCK,CD4,PTPRC,CD79A,CIITA
Graft-versus-Host Disease Signaling	4.39E00	3.54E-01		HLA-E,HLA-DOA,HLA-DQA1,HLA-DQB1,FCER1G,HLA-F,HLA-DRA,IL18,HLA-A,HLA-DRB1,HLA-DMA,HLA-DRB5,HLA-DMB,HLA-C,HLA-B,CD86,IL33
NRF2-mediated Oxidative Stress Response	4.35E00	2.33E-01	2.858	SOD1,ABCC4,MRAS,DNAJC16,FMO1,PIK3R5,SCARB1,PRDX1,GSTT1,AKR7A3,GSTO1,FKBP5,PIK3CD,CDC34,GSTM2,AOX1,PRKCB,CREBBP,GSTP1,ACTG2,CYP4Z1,CLPP,GSTT2/GSTT2B,CBR1,TXN,HSPB8,GSTM3,PPIB,MAF,HMOX1,MAFF,SOD2,SOD3,ATF4,PRKCA,MAP2K4,MAP3K1,MAP2K2,FTL,HRAS,RBX1,HERPUD1
Molecular Mechanisms of Cancer	4.22E00	1.97E-01		TGFB1,PLCB2,MRAS,JAK3,CDKN2A,PIK3R5,NFKBIE,PRKACB,BIRC3,ADCY1,ARHGEF6,PIK3CD,RAC3,CDKN2D,NFKBIB,PRKCB,PRKAR1B,MAPK11,NF1,STK36,RND3,PRKAR2A,AURKA,MAPK12,LEF1,TGFB2,CYCS,BAD,MYC,SMAD5,ARHGEF2,BAX,BID,RHOU,PMAIP1,GNA15,ARHGEF11,WNT5A,ITGA2,E2F1,IRS1,RAC2,BMPR1B,APC,APH1A,CCND3,E2F4,HHAT,FYN,E2F2,CREBBP,CDK6,BMP7,PLCB1,CASP10,ADCY5,PAK1,WNT7B,WNT5B,DVL1,NCSTN,PRKCA,MAP2K4,PSEN2,BMP1,MAP2K2,FZD8,RASA…
Type I Diabetes Mellitus Signaling	4.18E00	2.64E-01	-1.387	SOCS3,HLA-DQA1,HSPD1,FCER1G,NFKBIE,HLA-F,HLA-DRB1,HLA-DMA,CD3D,HLA-DRB5,HLA-DMB,NFKBIB,MAPK11,CD86,CD3E,HLA-E,HLA-DOA,HLA-DQB1,TNFRSF1B,MAPK12,TRADD,CYCS,HLA-DRA,HLA-A,MAP2K4,CPE,HLA-C,HLA-B,BID
Role of Tissue Factor in Cancer	4.18E00	2.64E-01		HCK,MRAS,PIK3R5,FGR,ARRB2,FRK,ARRB1,RPS6KA5,FYN,CFL1,PIK3CD,LCK,MAPK11,VEGFC,PLCB1,HBEGF,F7,PAK1,MAPK12,PLAUR,MMP13,PDXP,PRKCA,F3,HRAS,MMP1,GNA15,P4HB,LYN
Calcium-induced T Lymphocyte Apoptosis	4.16E00	3.12E-01	-3.000	CD3E,HLA-DOA,HLA-DQA1,HLA-DQB1,NR4A1,CALML5,FCER1G,HLA-DRA,HLA-DRB1,PRKCA,HLA-DMA,CD3D,LCK,HLA-DRB5,HLA-DMB,PRKCB,CD4,MEF2D,ORAI1,CAPN2
Communication between Innate and Adaptive Immune Cells	4E00	2.75E-01		CCR7,TLR5,FCER1G,CD40,HLA-F,CD83,CD8A,HLA-DRB1,HLA-DRB5,CD4,CCL4,TLR2,CD86,IL33,CCL3,HLA-E,CCL5,CXCL10,B2M,HLA-DRA,IL18,HLA-A,TLR3,HLA-C,HLA-B
iCOS-iCOSL Signaling in T Helper Cells	3.92E00	2.59E-01	-2.840	HLA-DQA1,CALML5,PIK3R5,IL2RB,FCER1G,NFKBIE,CD40,IL2RG,LCP2,HLA-DRB1,INPP5D,PIK3CD,HLA-DMA,LCK,CD3D,HLA-DRB5,HLA-DMB,NFKBIB,CD4,LAT,CD3E,HLA-DOA,HLA-DQB1,VAV1,BAD,HLA-DRA,CSK,PTPRC
Role of Macrophages, Fibroblasts and Endothelial Cells in Rheumatoid Arthritis	3.88E00	2.01E-01		TLR5,TGFB1,PLCB2,FCGR1A,MRAS,SFRP1,PIK3R5,PLCE1,NFKBIE,IL16,PIK3CD,C5AR1,NFKBIB,PRKCB,TRAF1,VEGFC,TLR2,LTB,IL32,CCL5,TNFRSF1B,LEF1,C5,TRADD,TRAF5,MMP3,MYC,IL18,CREB3L4,MMP1,SOCS3,WNT5A,PGF,CALML5,SELE,APC,VCAM1,CREBBP,MIF,PLCL1,IL33,PLCB1,CEBPD,WNT7B,WNT5B,MMP13,DAAM1,DVL1,IL6ST,PLCG2,ATF4,TLR3,PRKCA,MAP2K4,CCL2,CEBPB,MAP2K2,FZD8,HRAS,PDGFA
Autoimmune Thyroid Disease Signaling	3.69E00	3.27E-01		HLA-E,HLA-DOA,HLA-DQA1,HLA-DQB1,FCER1G,CD40,HLA-F,HLA-DRA,HLA-A,HLA-DRB1,HLA-DMA,HLA-DRB5,HLA-DMB,HLA-C,HLA-B,CD86
Production of Nitric Oxide and Reactive Oxygen Species in Macrophages	3.69E00	2.22E-01	-3.683	NCF1,JAK3,PIK3R5,PPP2R3B,NFKBIE,APOC1,NCF2,IRF8,PIK3CD,PPP1R3C,PPP2R5A,PPP1R14B,MAP3K8,NFKBIB,PRKCB,CREBBP,MAPK11,PTPN6,SIRPA,TLR2,RND3,APOL1,NCF4,TNFRSF1B,APOD,MAPK12,SPI1,MAP3K9,PLCG2,LYZ,PRKCA,MAP2K4,CLU,MAP3K1,SERPINA1,APOE,CYBB,RHOF,CYBA,RHOU
PI3K Signaling in B Lymphocytes	3.68E00	2.42E-01	-2.414	PLCB2,MRAS,CALML5,PLCE1,IRS1,NFKBIE,CD40,FYN,INPP5D,PIK3CD,PIK3AP1,NFKBIB,PRKCB,CD180,ATF5,CD79A,PLCL1,VAV3,PLCB1,IRS2,BTK,ATF6,VAV1,PLCG2,FCGR2B,ATF4,MAP2K2,ATF7,PTPRC,HRAS,LYN
CCR5 Signaling in Macrophages	3.65E00	2.9E-01		CD3E,CCL3,CCL5,GNG11,MAPK12,MRAS,CALML5,FCER1G,PLCG2,GNB1L,CCR5,PRKCA,MAP2K4,CD3D,GNG12,PRKCB,CD4,GNG2,MAPK11,CCL4
HIF1α Signaling	3.56E00	2.55E-01		MMP9,MRAS,PGF,PIK3R5,PIK3CD,TCEB1,EDN1,ARNT,CREBBP,NOS3,MAPK11,VEGFC,TCEB2,NAA10,SLC2A3,MAPK12,MMP13,MMP7,MMP3,MMP19,HRAS,MMP1,RBX1,MMP24,MMP16,LDHB
T Cell Receptor Signaling	3.52E00	2.58E-01		MRAS,CALML5,PIK3R5,CARD11,LCP2,FYN,CD8A,PIK3CD,LCK,CD3D,CD4,LAT,VAV3,CD3E,PAG1,BTK,VAV1,MAP2K4,CSK,MAP3K1,MAP2K2,PTPRC,RASA1,HRAS,PTPN7
T Helper Cell Differentiation	3.47E00	2.82E-01		IL21R,HLA-DOA,TGFB1,HLA-DQA1,HLA-DQB1,TNFRSF1B,FCER1G,CD40,IL6ST,IL2RG,HLA-DRA,IL10RA,GATA3,IL18,HLA-DRB1,HLA-DMA,HLA-DRB5,HLA-DMB,RORC,CD86
Amyloid Processing	3.46E00	3.14E-01	0.000	CAPN9,MAPK12,CSNK2A2,CAPN8,CAPN10,PRKACB,APH1A,NCSTN,CAPN5,PSEN2,MARK1,PRKAR1B,MAPK11,MAPT,PRKAR2A,CAPN2
Nur77 Signaling in T Lymphocytes	3.35E00	2.98E-01		CD3E,HLA-DOA,HLA-DQA1,HLA-DQB1,NR4A1,CALML5,FCER1G,CYCS,HLA-DRA,HLA-DRB1,HLA-DMA,CD3D,HLA-DRB5,HLA-DMB,MEF2D,HDAC9,CD86
Virus Entry via Endocytic Pathways	3.31E00	2.58E-01		ITGAL,ITGA2,MRAS,PIK3R5,B2M,ITGB2,RAC2,ITGB7,PLCG2,CAV1,FYN,HLA-A,PIK3CD,PRKCA,RAC3,PRKCB,FLNC,HLA-C,HLA-B,CLTB,AP2S1,HRAS,ACTG2
Apoptosis Signaling	3.31E00	2.58E-01	-0.626	CAPN9,CASP10,MCL1,TNFRSF1B,MRAS,NFKBIE,CAPN8,CAPN10,CYCS,BAD,BIRC3,PLCG2,PARP1,CAPN5,PRKCA,ENDOG,MAP2K4,MAP2K2,NFKBIB,BAX,HRAS,BID,CAPN2
STAT3 Pathway	3.3E00	2.74E-01		FGFR2,FGFR3,FGFR1,PIAS3,SOCS3,MAPK12,MRAS,CISH,MAP3K9,BMPR1B,NDUFA13,MYC,MAP2K4,PIM1,MAP2K2,PTPN6,MAPK11,NTRK2,FGFR4,HRAS
B Cell Receptor Signaling	3.27E00	2.16E-01		MRAS,CALML5,PIK3R5,CD22,NFKBIE,RAC2,CFL1,INPP5D,PIK3CD,PIK3AP1,MAP3K8,NFKBIB,PRKCB,APBB1IP,CREBBP,MAPK11,PTPN6,CD79A,VAV3,RPS6KB2,PAG1,MAPK12,BTK,VAV1,BAD,MAP3K9,PLCG2,FCGR2B,ATF4,CREB3L4,MAP2K4,CSK,MAP3K1,MAP2K2,PTPRC,ETS1,HRAS,LYN
ERK5 Signaling	3.26E00	2.86E-01	0.000	RPS6KB2,SFN,CTF1,MRAS,LIF,ELK4,IL6ST,BAD,EGF,RPS6KA5,MYC,ATF4,CREB3L4,SGK1,MAP3K8,CREBBP,MEF2D,HRAS
Reelin Signaling in Neurons	3.24E00	2.66E-01		ARHGEF11,ITGAL,HCK,ITGA2,MAPK12,MAP4K1,PIK3R5,MAPK8IP2,FGR,ITGB2,FRK,MAP3K9,FYN,ARHGEF6,PIK3CD,MAP2K4,LCK,ARHGEF2,APOE,MAPT,LYN
Atherosclerosis Signaling	3.22E00	2.34E-01		TGFB1,MMP9,PLA2G16,PLA2G7,TPSAB1/TPSB2,ITGB2,SELE,CD40,APOC1,VCAM1,IL33,APOL1,APOD,MMP13,LYZ,MMP3,IL18,SELP,CLU,CCL2,SELPLG,LPL,SERPINA1,ALOX15B,RARRES3,F3,APOE,PDGFA,MMP1
Hepatic Fibrosis / Hepatic Stellate Cell Activation	3.1E00	2.07E-01		CXCL9,FGFR2,CCR7,FGFR1,COL7A1,TGFB1,MMP9,PGF,CD40,VCAM1,IL10RA,CCR5,LY96,EDN1,VEGFC,LTB,TNFSF12-TNFSF13,CCL5,TNFRSF1B,CD14,COL17A1,TGFB2,COL4A5,MYL6B,IGFBP5,MYH10,MYL9,MMP13,COL6A2,CCL21,IGF2,AGT,MYL6,EGF,CCL2,TNFSF10,TIMP1,SERPINE1,BAX,PDGFA,MMP1
Pyrimidine Deoxyribonucleotides De Novo Biosynthesis I	3.09E00	4.09E-01		NME7,TYMS,DUT,AK8,AK4,NME1,NME5,NME2,DTYMK
ILK Signaling	3.08E00	2.1E-01	-1.859	MMP9,DSP,PGF,PIK3R5,PPP2R3B,LIMS2,IRS1,ITGB2,MUC1,ITGB7,SNAI1,VIM,RPS6KA5,CFL1,ARHGEF6,PIK3CD,PPP2R5A,SNAI2,PPP1R14B,CREBBP,FLNC,VEGFC,RND3,ACTG2,IRS2,MAPK12,LEF1,MYL6B,MYH10,MYL9,PARVB,MYL6,MYC,ATF4,CREB3L4,MAP2K4,RHOF,RHOU,TMSB10/TMSB4X
Neuroprotective Role of THOP1 in Alzheimer's Disease	3.08E00	3.25E-01		HLA-E,MMP9,THOP1,PRKACB,HLA-F,AGT,HLA-A,HLA-C,PRKAR1B,HLA-B,MAPT,ECE2,PRKAR2A
Protein Ubiquitination Pathway	3.07E00	1.96E-01		USP35,UBE2M,DNAJC16,UBD,USP21,BIRC3,PSMA7,PSMB7,STUB1,USP32,HSPB6,TCEB2,PSMA4,USP22,CRYAB,HSPB8,ANAPC11,HSPB1,TAP2,DNAJC22,UBE2C,HLA-C,HLA-B,RBX1,PSMB10,PSMB9,PSMB8,PSMD7,THOP1,HSPD1,PSMA3,PSME2,TAP1,HSPE1,UBE2E2,UBE2S,PSMD9,CDC34,TCEB1,PSMC1,PSMB3,UCHL1,HSCB,PSMC3,B2M,CDC20,BTRC,HLA-A,USP25,UCHL3
Caveolar-mediated Endocytosis Signaling	3.03E00	2.68E-01		ITGAL,ITGA2,CD48,ITGAE,ITGAX,B2M,ITGB2,ITGB7,EGF,CAV1,FYN,HLA-A,PRKCA,COPA,COPE,HLA-C,FLNC,HLA-B,ACTG2
Fcγ Receptor-mediated Phagocytosis in Macrophages and Monocytes	3.02E00	2.47E-01	-3.962	RPS6KB2,HCK,FCGR1A,PLD3,PAK1,NCF1,FGR,FYB,RAC2,ARPC1B,HMOX1,VAV1,LCP2,WAS,FYN,INPP5D,PRKCA,RAC3,PIP5K1A,PRKCB,ACTG2,VAV3,LYN
LPS/IL-1 Mediated Inhibition of RXR Function	2.99E00	2.01E-01	0.577	ABCC4,FABP3,FMO1,IL4I1,SCARB1,APOC1,GSTT1,FMO2,MGMT,FMO5,GSTO1,ALDH9A1,LY96,ACSL1,ALDH1A1,GSTM2,NR1H3,ACOX2,GSTP1,CHST1,ECSIT,CHST12,IL33,CHST2,CHST3,GSTT2/GSTT2B,ALDH3B2,FABP4,SMOX,TNFRSF1B,CD14,ALDH6A1,GSTM3,CHST11,ALDH4A1,ACSL4,SOD3,IL18,MAP2K4,MAP3K1,APOE,SLC27A5,ALDH1A3,PLTP
Acute Myeloid Leukemia Signaling	2.98E00	2.6E-01	-0.243	RPS6KB2,PML,CSF2RB,CSF2RA,MRAS,LEF1,PIK3R5,PIM2,KIT,SPI1,BAD,CSF1R,MYC,PIK3CD,MAP2K4,PIM1,MAP2K2,FLT3LG,HRAS,EIF4EBP1
Altered T Cell and B Cell Signaling in Rheumatoid Arthritis	2.98E00	2.5E-01		TLR5,HLA-DOA,TGFB1,HLA-DQA1,HLA-DQB1,FCER1G,CD40,CCL21,HLA-DRA,IL18,HLA-DRB1,TLR3,CXCL13,HLA-DMA,HLA-DRB5,HLA-DMB,SPP1,CD79A,TLR2,CD86,IL33,LTB
Aryl Hydrocarbon Receptor Signaling	2.97E00	2.21E-01	-0.471	TGFB1,MCM7,CDKN2A,E2F1,GSTT1,CCND3,NFIC,ALDH9A1,GSTO1,ALDH1A1,GSTM2,ARNT,TRIP11,CDK6,GSTP1,ESR1,NRIP1,GSTT2/GSTT2B,NCOA7,AIP,ALDH3B2,ALDH6A1,GSTM3,TGFB2,NFIA,ALDH4A1,HSPB1,MYC,BAX,ALDH1A3,NCOA2
Systemic Lupus Erythematosus Signaling	2.95E00	2E-01		FCGR1B,FCGR1A,MRAS,LSM7,PIK3R5,CD22,FCER1G,CD40,HLA-F,INPP5D,PIK3CD,LCK,SNRPA1,CD3D,SNRPA,PTPN6,LAT,CD79A,CD86,IL33,CD3E,HLA-E,C7,C5,PIM2,LSM4,LSM1,SART1,PLCG2,SNRPD2,IL18,HLA-A,FCGR2B,LSM10,NHP2L1,TXNL4A,SNRPD3,HLA-C,HLA-B,PTPRC,HRAS,PRPF31,SF3B4,LYN
RAR Activation	2.9E00	2.05E-01		PML,TGFB1,PBRM1,RBP7,CSNK2A2,CRABP2,PRKACB,SCAND1,ADCY1,DHRS3,PIK3CD,ALDH1A1,PRKCB,PRKAR1B,CREBBP,MAPK11,NCOR1,PRKAR2A,NRIP1,REL,ADCY5,MAPK12,CSF2RB,RBP1,TGFB2,NR2F2,CITED2,IL3RA,AKR1C3,PARP1,PRKCA,MAP2K4,SMAD5,ARID2,CSK,MAP3K1,ALDH1A3,MMP1,ADCY9
IL-8 Signaling	2.89E00	2.07E-01	-4.564	MMP9,PLCB2,GNG11,MRAS,PLD3,PGF,PIK3R5,ITGB2,RAC2,ARRB2,VCAM1,NCF2,CCND3,PIK3CD,RAC3,NFKBIB,PRKCB,EIF4EBP1,VEGFC,RND3,HBEGF,MAPK12,CSTB,ITGAX,MYL9,HMOX1,GNB1L,EGF,PRKCA,MAP2K4,MAP2K2,GNG12,GNG2,BAX,HRAS,CYBB,RHOF,RHOU
P2Y Purigenic Receptor Signaling Pathway	2.83E00	2.27E-01	-1.400	PLCB2,GNG11,MRAS,PIK3R5,PLCE1,PRKACB,ADCY1,P2RY11,PIK3CD,PRKCB,PRKAR1B,CREBBP,PLCL1,PRKAR2A,PLCB1,ADCY5,PLCG2,GNB1L,MYC,ATF4,PRKCA,CREB3L4,MAP2K2,GNG12,GNG2,HRAS,ADCY9
Axonal Guidance Signaling	2.82E00	1.76E-01		EFNA4,PLCB2,TUBB3,GNG11,MRAS,PIK3R5,PLCE1,PRKACB,ARPC1B,CHMP1A,KIF7,WAS,ARHGEF6,PIK3CD,RAC3,SEMA3C,PRKCB,PRKAR1B,FES,STK36,VEGFC,PRKAR2A,EFNB1,ADAM19,MYL6B,MYL9,EPHB2,GNB1L,EGF,SEMA6C,SHANK2,GNG12,MYSM1,TUBA4A,ADAM28,GNA15,LINGO1,ARHGEF11,SEMA3E,MMP9,WNT5A,ITGA2,TUBB6,PGF,SEMA6D,WIPF1,EPHA2,RAC2,CFL1,FYN,PFN1,SEMA7A,EFNA1,NTRK2,PLCL1,ECE2,BMP7,PLCB1,PAK1,WNT7B,SDC2,WNT5B,GLI3,MMP13,RTN4R,PLCG2,MM…
Xenobiotic Metabolism Signaling	2.71E00	1.88E-01		MRAS,PIK3R5,SCAND1,FMO2,ALDH9A1,FMO5,GSTO1,PIK3CD,ANKRA2,PPP2R5A,ALDH1A1,MAP3K8,GSTM2,PRKCB,ARNT,MAPK11,CHST12,CHST2,CHST3,GSTT2/GSTT2B,SMOX,MAPK12,ALDH6A1,GSTM3,MAF,CITED2,SOD3,MAP3K1,RBX1,FMO1,IL4I1,PPP2R3B,GSTT1,MGMT,CREBBP,GRIP1,GSTP1,CHST1,NRIP1,AIP,ALDH3B2,CHST11,HMOX1,MAP3K9,ALDH4A1,PRKCA,MAP2K4,MAP2K2,FTL,HRAS,ALDH1A3
Tec Kinase Signaling	2.67E00	2.09E-01	-2.887	HCK,GNG11,MRAS,ITGA2,JAK3,PIK3R5,FGR,FCER1G,FRK,WAS,FYN,PIK3CD,LCK,PRKCB,RND3,ACTG2,VAV3,PAK1,MAPK12,BTK,VAV1,PLCG2,GNB1L,PRKCA,MAP2K4,GTF2I,TNFSF10,GNG12,GNG2,RHOF,RHOU,GNA15,LYN
Natural Killer Cell Signaling	2.67E00	2.27E-01		LILRB1,MRAS,PIK3R5,FCER1G,RAC2,LCP2,FYN,INPP5D,PIK3CD,CD300A,LCK,TYROBP,RAC3,PRKCB,PTPN6,LAT,VAV3,LAIR1,PAK1,HCST,VAV1,PLCG2,PRKCA,MAP2K2,HRAS
Bladder Cancer Signaling	2.67E00	2.41E-01		FGFR3,MMP9,MRAS,PGF,CDKN2A,E2F1,FGF7,MMP13,MMP7,EGF,RPS6KA5,MMP3,MYC,MMP19,MAP2K2,FGF14,HRAS,VEGFC,MMP1,MMP24,MMP16
Salvage Pathways of Pyrimidine Ribonucleotides	2.65E00	2.37E-01		NME7,PKN1,AK8,APOBEC3G,PAK1,AK4,UPP1,NME1,MAP3K9,GRK5,MAP2K4,SGK1,PIM1,MAP3K8,UCKL1,MAP2K2,PRKAA2,CDK6,FAM20B,NME5,APOBEC3F,NME2
Regulation of the Epithelial-Mesenchymal Transition Pathway	2.62E00	2.01E-01		FGFR2,FGFR1,CDH2,PARD6A,TGFB1,MMP9,WNT5A,MRAS,JAK3,PIK3R5,NOTCH2,APC,APH1A,SNAI1,PIK3CD,SNAI2,FRS2,BCL9,FGFR4,TWIST1,FGFR3,WNT7B,LEF1,WNT5B,TGFB2,FGF7,DVL1,PYGO2,EGF,NCSTN,MAP2K4,PSEN2,MAP2K2,FZD8,FGF14,ETS1,HRAS
IL-12 Signaling and Production in Macrophages	2.61E00	2.15E-01		TGFB1,PIK3R5,MST1R,CD40,APOC1,IRF8,PIK3CD,MAP3K8,NFKBIB,PRKCB,MAPK11,TLR2,APOL1,REL,APOD,MAPK12,TGFB2,SPI1,MAF,JMJD6,LYZ,IL18,PRKCA,MAP2K4,CLU,CEBPB,MAP2K2,SERPINA1,APOE
PDGF Signaling	2.58E00	2.47E-01	-2.524	MRAS,CSNK2A2,JAK3,PIK3R5,SPHK1,ABL2,PLCG2,MYC,CAV1,INPP5D,PIK3CD,PRKCA,MAP2K4,MAP3K1,MAP2K2,PRKCB,RASA1,PDGFA,HRAS
Cardiac Hypertrophy Signaling	2.58E00	1.93E-01	-0.949	TGFB1,PLCB2,GNG11,MRAS,CALML5,PIK3R5,PLCE1,IRS1,PRKACB,ADCY1,PIK3CD,MAP3K8,PRKAR1B,CREBBP,MAPK11,MEF2D,PLCL1,RND3,CACNA1D,PRKAR2A,PLCB1,ADCY5,MAPK12,TGFB2,MYL6B,MYL9,ATF6,ADSS,MAP3K9,PLCG2,GNB1L,HSPB1,MYL6,MAP2K4,MAP3K1,MAP2K2,GNG12,GNG2,HRAS,RHOF,RHOU,ADCY9,GNA15
Glucocorticoid Receptor Signaling	2.57E00	1.85E-01		TGFB1,FCGR1A,MRAS,JAK3,POLR2F,PIK3R5,NFKBIE,PRKACB,PIK3CD,NFKBIB,MAPK11,POLR2I,ESR1,CD3E,CCL5,MAPK12,POLR2E,TGFB2,POLR2C,GTF2A1,ANXA1,AR,SGK1,MAP3K1,CD163,SERPINE1,MMP1,PRKAB2,PBRM1,PGR,SELE,VCAM1,POLR2L,FKBP5,CD3D,CREBBP,NCOR1,NRIP1,CCL3,SLPI,AGT,PBX1,MAP2K4,ARID2,CCL2,CEBPB,MAP2K2,PRKAA2,HRAS,NCOA2,TAF5L
Melanocyte Development and Pigmentation Signaling	2.49E00	2.38E-01	-0.688	RPS6KB2,ADCY5,MRAS,PIK3R5,KIT,PRKACB,PLCG2,SOX10,ADCY1,RPS6KA5,ATF4,PIK3CD,CREB3L4,MAP2K2,CREBBP,PRKAR1B,PTPN6,HRAS,ADCY9,PRKAR2A
Phospholipase C Signaling	2.47E00	1.88E-01	-2.959	ARHGEF11,PLCB2,GNG11,MRAS,PLD3,ITGA2,CALML5,PLCE1,FCER1G,ADCY1,LCP2,FYN,ARHGEF6,LCK,CD3D,PRKCB,CREBBP,LAT,MEF2D,HDAC9,CD79A,RND3,PLCB1,CD3E,ADCY5,BTK,MYL6B,MYL9,HMOX1,PLCG2,GNB1L,MYL6,FCGR2B,ATF4,PRKCA,CREB3L4,ARHGEF2,MAP2K2,GNG12,GNG2,HRAS,RHOF,RHOU,ADCY9,LYN
Acute Phase Response Signaling	2.46E00	2.01E-01	-1.400	CFB,TF,SOCS3,RBP7,MRAS,NFKBIE,CRABP2,C1R,C4A/C4B,PIK3CD,C2,NFKBIB,MAPK11,ECSIT,IL33,TNFRSF1B,MAPK12,RBP1,C5,TRADD,HMOX1,IL6ST,AGT,SOD2,IL18,MAP2K4,MAP3K1,CEBPB,MAP2K2,SERPINA1,FTL,SERPINE1,HPX,HRAS
FcγRIIB Signaling in B Lymphocytes	2.45E00	2.93E-01	-1.732	PIK3CD,FCGR2B,INPP5D,MAP2K4,MRAS,MAPK12,BTK,PIK3R5,HRAS,CD79A,PLCG2,LYN
Regulation of IL-2 Expression in Activated and Anergic T Lymphocytes	2.45E00	2.41E-01		CD3E,TGFB1,MAPK12,MRAS,CALML5,TGFB2,NFKBIE,VAV1,PLCG2,CARD11,FYN,MAP2K4,MAP3K1,CD3D,MAP2K2,NFKBIB,LAT,HRAS,VAV3
GDNF Family Ligand-Receptor Interactions	2.43E00	2.5E-01	-2.324	DOK4,IRS2,DOK2,MAPK12,GFRA1,MRAS,PIK3R5,IRS1,DOK7,PLCG2,PIK3CD,MAP2K4,FRS2,MAP2K2,DOK3,RASA1,HRAS
Allograft Rejection Signaling	2.37E00	2.33E-01		HLA-DPB1,HLA-DQA2,HLA-E,HLA-DOA,HLA-DQA1,HLA-DQB1,B2M,FCER1G,CD40,HLA-F,HLA-DRA,HLA-A,HLA-DRB1,HLA-DMA,HLA-DRB5,HLA-DMB,HLA-DPA1,HLA-C,HLA-B,CD86
TREM1 Signaling	2.34E00	2.4E-01	-3.300	CCL3,TLR5,NOD2,NLRC3,NLRC5,ITGAX,CD40,PLCG2,CD83,LAT2,IL18,FCGR2B,TLR3,TYROBP,CCL2,TLR2,CD86,CIITA
Role of NFAT in Cardiac Hypertrophy	2.31E00	1.96E-01	-1.219	TGFB1,PLCB2,GNG11,MRAS,CALML5,PIK3R5,PLCE1,PRKACB,ADCY1,PIK3CD,PRKCB,PRKAR1B,MAPK11,MEF2D,HDAC9,PLCL1,AKAP5,PRKAR2A,PLCB1,CTF1,ADCY5,MAPK12,TGFB2,LIF,IL6ST,PLCG2,GNB1L,PRKCA,MAP2K4,MAP3K1,MAP2K2,GNG12,GNG2,HRAS,ADCY9
NF-κB Signaling	2.29E00	1.97E-01	-1.715	FGFR2,FGFR1,TLR5,MRAS,CSNK2A2,PIK3R5,FCER1G,NFKBIE,CD40,PRKACB,BMPR1B,CARD11,PIK3CD,LCK,MAP3K8,NFKBIB,PRKCB,CREBBP,NTRK2,FGFR4,TLR2,IL33,FGFR3,TAB3,TNFRSF1B,BTRC,TRADD,TRAF5,PLCG2,EGF,IL18,TLR3,MAP3K1,HRAS
IL-4 Signaling	2.27E00	2.37E-01		RPS6KB2,HLA-DOA,HLA-DQA1,HLA-DQB1,MRAS,JAK3,PIK3R5,IRS1,IL2RG,HLA-DRA,INPP5D,HLA-DRB1,PIK3CD,HLA-DMA,HLA-DRB5,HLA-DMB,PTPN6,HRAS
Ephrin Receptor Signaling	2.25E00	1.95E-01		SH2D3C,EFNA4,GNG11,MRAS,ITGA2,PGF,WIPF1,EPHA2,RAC2,ARPC1B,WAS,FYN,CFL1,RAC3,CREBBP,EFNA1,PTPN13,VEGFC,EFNB1,PAK1,SDC2,EPHB2,GNB1L,EGF,ATF4,CREB3L4,SORBS1,MAP2K2,GNG12,RASA1,GNG2,PDGFA,HRAS,GNA15
CTLA4 Signaling in Cytotoxic T Lymphocytes	2.25E00	2.27E-01		CD3E,PIK3R5,PPP2R3B,B2M,FCER1G,LCP2,FYN,HLA-A,CD8A,PIK3CD,PPP2R5A,CD3D,LCK,HLA-C,PTPN6,HLA-B,CLTB,AP2S1,LAT,CD86
G Beta Gamma Signaling	2.25E00	2.27E-01		HBEGF,GNG11,PAK1,MRAS,BTK,PRKACB,PLCG2,ADCY1,GNB1L,CAV1,ARHGEF6,CAV2,PRKCA,GNG12,PRKCB,PRKAR1B,GNG2,HRAS,PRKAR2A,GNA15
Ovarian Cancer Signaling	2.21E00	2.06E-01		MMP9,WNT5A,MRAS,PGF,CDKN2A,PIK3R5,E2F1,PRKACB,APC,ARRB1,PIK3CD,EDN1,PRKAR1B,VEGFC,PRKAR2A,RPS6KB2,WNT7B,LEF1,WNT5B,DVL1,MMP7,EGF,MAP2K2,FZD8,RAD51,HRAS,GJA1
Superoxide Radicals Degradation	2.2E00	5.71E-01		CYGB,SOD2,SOD3,SOD1
p70S6K Signaling	2.2E00	2.1E-01	-1.633	PLCB2,MRAS,PIK3R5,PPP2R3B,PLCE1,IRS1,IL2RG,PIK3CD,PPP2R5A,PRKCB,MAPT,CD79A,PLCL1,PLCB1,RPS6,SFN,BTK,BAD,PLCG2,AGT,PRKCA,MAP2K2,HRAS,BCAP31,LYN
D-myo-inositol-5-phosphate Metabolism	2.19E00	2.01E-01		NUDT1,SOCS3,PLCB2,PLCE1,PPP1R16B,EPHX2,PPP2R5A,PPP1R14B,PTPN6,PTPN13,SIRPA,PPP1R1B,PPFIBP2,PLCB1,PPP1R12C,DUSP2,PLCG2,ALPL,PDXP,ACP5,NT5C,PTPRC,RASA1,NUDT15,PPFIA3,NUDT12,NUDT14,PTPN7,CDC25B
Oncostatin M Signaling	2.14E00	2.94E-01	-2.333	MT2A,MMP3,CHI3L1,MRAS,MAP2K2,JAK3,MMP13,HRAS,MMP1,IL6ST
CXCR4 Signaling	2.12E00	1.97E-01	-3.530	ARHGEF11,PLCB2,GNG11,MRAS,PIK3R5,ADCY1,ELMO3,PIK3CD,PRKCB,CD4,RND3,PLCB1,ADCY5,PAK1,MAPK12,MYL6B,MYL9,GNB1L,MYL6,PRKCA,MAP2K4,MAP2K2,GNG12,GNG2,HRAS,RHOF,RHOU,ADCY9,GNA15,LYN
Glioblastoma Multiforme Signaling	2.1E00	1.99E-01	-0.816	PLCB2,WNT5A,MRAS,CDKN2A,PIK3R5,E2F1,PLCE1,APC,E2F4,PIK3CD,E2F2,CDK6,NF1,PLCL1,RND3,PLCB1,WNT7B,LEF1,WNT5B,IGF2,PLCG2,EGF,MYC,MAP2K2,FZD8,PDGFA,HRAS,RHOF,RHOU
Renin-Angiotensin Signaling	2.09E00	2.11E-01	-1.877	CCL5,ADCY5,MAPK12,PAK1,MRAS,PIK3R5,PRKACB,PLCG2,ADCY1,AGT,PIK3CD,PRKCA,MAP2K4,MAP3K1,CCL2,MAP2K2,PRKCB,PRKAR1B,PTPN6,MAPK11,HRAS,ADCY9,PRKAR2A
FGF Signaling	2.08E00	2.24E-01	-1.147	FGFR2,FGFR3,FGFR1,MAPK12,PIK3R5,FGF7,RPS6KA5,ATF4,PIK3CD,CREB3L4,PRKCA,MAP3K1,FRS2,CREBBP,PTPN6,FGF14,MAPK11,FGFR4,HRAS
IL-17A Signaling in Fibroblasts	2.04E00	2.86E-01		CEBPD,CCL2,CEBPB,MAPK12,NFKBIB,MAPK11,NFKBIE,NFKBIZ,LCN2,MMP1
Noradrenaline and Adrenaline Degradation	2.04E00	2.86E-01		ALDH9A1,HSD17B10,SMOX,COMT,ALDH1A1,IL4I1,ALDH1A3,DHRS4,DHRS2,ALDH4A1
Antioxidant Action of Vitamin C	2.03E00	2.14E-01	2.183	PLCB1,NXN,SLC2A3,PLA2G16,PLCB2,PLD3,MAPK12,CSF2RB,CSF2RA,TXN,PLCE1,PLA2G7,NFKBIE,HMOX1,PLCG2,GSTO1,MAP2K4,NFKBIB,RARRES3,MAPK11,PLCL1
Agrin Interactions at Neuromuscular Junction	1.99E00	2.32E-01	-1.604	ITGAL,ERBB4,ITGA2,MAPK12,PAK1,MRAS,ITGB2,RAC2,DVL1,ARHGEF6,MAP2K4,RAC3,ERBB3,HRAS,DAG1,ACTG2
CD27 Signaling in Lymphocytes	1.98E00	2.5E-01		SIVA1,MAPK12,NFKBIE,CYCS,MAP3K9,TRAF5,MAP2K4,MAP3K1,MAP3K8,MAP2K2,NFKBIB,BID,CD27
FAK Signaling	1.97E00	2.18E-01		CAPN9,ITGA2,PAK1,MRAS,PIK3R5,CAPN8,CAPN10,PLCG2,EGF,WAS,FYN,ARHGEF6,PIK3CD,CAPN5,CSK,MAP2K2,HRAS,ACTG2,CAPN2
Salvage Pathways of Pyrimidine Deoxyribonucleotides	1.94E00	5E-01		TK1,APOBEC3B,TYMP,APOBEC3G
Pancreatic Adenocarcinoma Signaling	1.94E00	2.08E-01	-2.500	HBEGF,TGFB1,MMP9,PLD3,MAPK12,BIRC5,PGF,JAK3,CDKN2A,PIK3R5,E2F1,TGFB2,HMOX1,BAD,E2F4,EGF,PIK3CD,MAP2K4,E2F2,MAP2K2,RAD51,VEGFC
Huntington's Disease Signaling	1.89E00	1.78E-01		CAPN9,PLCB2,GNG11,UBD,POLR2F,PIK3R5,CAPN8,PSME2,UBE2S,POLR2L,PIK3CD,HIP1,PRKCB,CREBBP,NCOR1,POLR2I,HDAC9,CAPN2,PLCB1,CASP10,POLR2E,POLR2C,CAPN10,CYCS,GNB1L,REST,EGF,RCOR3,ATF4,PRKCA,CAPN5,CREB3L4,MAP2K4,SGK1,GNG12,CLTB,RASA1,GNG2,BAX,HRAS,GNA15
CREB Signaling in Neurons	1.88E00	1.87E-01	-0.853	PLCB2,GNG11,MRAS,CALML5,POLR2F,PIK3R5,PLCE1,PRKACB,ADCY1,POLR2L,PIK3CD,PRKCB,PRKAR1B,CREBBP,POLR2I,PLCL1,PRKAR2A,PLCB1,ADCY5,POLR2E,POLR2C,PLCG2,GNB1L,ATF4,PRKCA,CREB3L4,MAP2K2,GNG12,GNG2,HRAS,ADCY9,GNA15
Chemokine Signaling	1.87E00	2.25E-01	-3.000	PLCB1,CCL5,PLCB2,MAPK12,MRAS,CALML5,PLCG2,CCR5,CFL1,PRKCA,CCL2,MAP2K2,PRKCB,MAPK11,CCL4,HRAS
Breast Cancer Regulation by Stathmin1	1.87E00	1.83E-01		ARHGEF11,UHMK1,PLCB2,GNG11,TUBB3,MRAS,TUBB6,CALML5,PIK3R5,E2F1,PPP2R3B,PRKACB,ADCY1,E2F4,ARHGEF6,PIK3CD,PPP1R3C,PPP2R5A,PPP1R14B,E2F2,PRKCB,PRKAR1B,PRKAR2A,PLCB1,ADCY5,PAK1,GNB1L,PRKCA,ARHGEF2,MAP2K2,GNG12,TUBA4A,GNG2,HRAS,ADCY9
Sertoli Cell-Sertoli Cell Junction Signaling	1.86E00	1.85E-01		F11R,ZAK,TUBB3,MRAS,ITGA2,YBX3,TUBB6,CLDN8,CLDN1,PRKACB,WAS,MAP3K8,CLDN5,PRKAR1B,NOS3,MAPK11,ACTG2,PRKAR2A,OCLN,MAPK12,CLDN12,CLDN15,CGN,SPTBN2,MAP3K9,MAP2K4,SORBS1,MAP3K1,MYO7A,MAP2K2,TUBA4A,TJP3,HRAS
Adenosine Nucleotides Degradation II	1.85E00	3.53E-01		ADA,AOX1,PNP,NT5C,NT5E,CECR1
Putrescine Degradation III	1.85E00	3.53E-01		ALDH9A1,SMOX,ALDH1A1,IL4I1,ALDH1A3,ALDH4A1
fMLP Signaling in Neutrophils	1.84E00	2.04E-01	-2.982	PLCB1,PLCB2,GNG11,MRAS,CALML5,NCF1,PIK3R5,NFKBIE,ARPC1B,NCF2,GNB1L,WAS,PIK3CD,PRKCA,MAP2K2,NFKBIB,GNG12,PRKCB,GNG2,HRAS,CYBB,FPR3
Cytotoxic T Lymphocyte-mediated Apoptosis of Target Cells	1.84E00	2.81E-01	-0.447	CD3E,HLA-A,CD3D,HLA-C,B2M,HLA-B,FCER1G,CYCS,BID
PPARα/RXRα Activation	1.83E00	1.84E-01	-0.728	TGFB1,PLCB2,MRAS,PLCE1,IRS1,NFKBIE,PRKACB,ADCY1,NFKBIB,PRKCB,PRKAR1B,CREBBP,NCOR1,PLCL1,PRKAR2A,PLCB1,AIP,ADCY5,TGFB2,CLOCK,PLCG2,PRKCA,MAP2K4,MAP2K2,PRKAA2,LPL,MED12,HRAS,ADCY9,PRKAB2,ACVR2B,GNA15,GPD2
LXR/RXR Activation	1.83E00	1.98E-01	2.132	TF,MMP9,CD14,TNFRSF1B,APOD,IRF3,APOC1,AGT,LYZ,C4A/C4B,IL18,LY96,TLR3,CLU,CCL2,NR1H3,LPL,SERPINA1,APOE,NCOR1,HPX,PLTP,APOL1,IL33
GPCR-Mediated Nutrient Sensing in Enteroendocrine Cells	1.81E00	2.14E-01		PLCB1,PLCB2,RAPGEF4,GNG11,ADCY5,PLCE1,PRKACB,PLCG2,ADCY1,PRKCA,GNG12,PRKCB,PRKAR1B,GNG2,PLCL1,ADCY9,PRKAR2A,GNA15
Dopamine Receptor Signaling	1.81E00	2.18E-01	1.265	SMOX,COMT,ADCY5,PTS,IL4I1,PPP2R3B,PRKACB,ADCY1,GCH1,PPP1R3C,PPP2R5A,PPP1R14B,NCS1,PRKAR1B,PPP1R1B,ADCY9,PRKAR2A
Superpathway of Inositol Phosphate Compounds	1.8E00	1.81E-01		NUDT1,SOCS3,PLCB2,PIK3R5,PLCE1,PPP1R16B,EPHX2,INPP5D,PIK3CD,PPP2R5A,PPP1R14B,PPIP5K2,PIP5K1A,PTPN6,PTPN13,SIRPA,PPP1R1B,PPFIBP2,PLCB1,PPP1R12C,DUSP2,PLCG2,ALPL,PI4KB,PDXP,ACP5,NT5C,PTPRC,RASA1,NUDT15,PPFIA3,NUDT12,NUDT14,PTPN7,CDC25B
β-alanine Degradation I	1.8E00	1E00		ALDH6A1,ABAT
Adenine and Adenosine Salvage I	1.8E00	1E00		PNP,APRT
Fc Epsilon RI Signaling	1.8E00	2.02E-01	-3.411	MAPK12,MRAS,BTK,PIK3R5,FCER1G,RAC2,VAV1,PLCG2,LCP2,FYN,INPP5D,PIK3CD,PRKCA,MAP2K4,RAC3,MAP2K2,PRKCB,MAPK11,LAT,HRAS,VAV3,LYN
D-myo-inositol (1,4,5,6)-Tetrakisphosphate Biosynthesis	1.8E00	1.95E-01		NUDT1,SOCS3,PPP1R16B,EPHX2,PPP2R5A,PPP1R14B,PTPN6,PTPN13,SIRPA,PPP1R1B,PPFIBP2,PPP1R12C,DUSP2,ALPL,PDXP,ACP5,NT5C,PTPRC,RASA1,NUDT15,PPFIA3,NUDT12,NUDT14,PTPN7,CDC25B
D-myo-inositol (3,4,5,6)-tetrakisphosphate Biosynthesis	1.8E00	1.95E-01		NUDT1,SOCS3,PPP1R16B,EPHX2,PPP2R5A,PPP1R14B,PTPN6,PTPN13,SIRPA,PPP1R1B,PPFIBP2,PPP1R12C,DUSP2,ALPL,PDXP,ACP5,NT5C,PTPRC,RASA1,NUDT15,PPFIA3,NUDT12,NUDT14,PTPN7,CDC25B
Signaling by Rho Family GTPases	1.78E00	1.75E-01	-2.535	ARHGEF11,CDH2,PARD6A,GNG11,PKN1,MRAS,ITGA2,PIK3R5,WIPF1,ARPC1B,NCF2,VIM,WAS,CFL1,ARHGEF6,PIK3CD,SEPT3,PIP5K1A,RND3,ACTG2,SEPT1,SEPT8,PAK1,MAPK12,MYL6B,MYL9,PPP1R12C,MAP3K9,GNB1L,MYL6,CDC42EP1,MAP2K4,SEPT4,ARHGEF2,MAP2K2,GNG12,GNG2,CYBB,RHOF,RHOU,GNA15
IL-1 Signaling	1.77E00	2.09E-01	-0.535	GNG11,ADCY5,MAPK12,MRAS,NFKBIE,PRKACB,ADCY1,GNB1L,MAP2K4,MAP3K1,NFKBIB,GNG12,PRKAR1B,GNG2,MAPK11,ECSIT,ADCY9,PRKAR2A,GNA15
Integrin Signaling	1.76E00	1.79E-01	-3.307	CAPN9,ITGAL,MRAS,ITGA2,NEDD9,ITGAE,TSPAN4,PIK3R5,TSPAN7,ITGB2,WIPF1,CAPN8,RAC2,ARPC1B,ITGB7,WAS,FYN,PIK3CD,RAC3,RND3,ACTG2,CAPN2,PAK1,ITGAX,MYL9,CAPN10,PARVB,PLCG2,CAV1,CAPN5,MAP2K4,MAP2K2,HRAS,RHOF,TTN,RHOU
GNRH Signaling	1.76E00	1.94E-01	-0.600	PLCB2,MRAS,PRKACB,ADCY1,MAP3K8,PRKCB,PRKAR1B,CREBBP,MAPK11,PRKAR2A,PLCB1,ADCY5,PAK1,MAPK12,MAP3K9,EGF,ATF4,PRKCA,CREB3L4,MAP2K4,MAP3K1,MAP2K2,HRAS,ADCY9,GNA15
Prolactin Signaling	1.76E00	2.19E-01	-2.138	TCF7,SOCS3,MRAS,PIK3R5,IRS1,PLCG2,MYC,FYN,PIK3CD,PRLR,PRKCA,CEBPB,MAP2K2,PRKCB,CREBBP,HRAS
G Protein Signaling Mediated by Tubby	1.75E00	2.73E-01		PLCB1,GNB1L,PLCB2,GNG11,LCK,MRAS,GNG12,GNG2,PLCG2
Sucrose Degradation V (Mammalian)	1.73E00	4.44E-01		TPI1,KHK,ALDOC,GALM
p53 Signaling	1.73E00	2.04E-01	0.943	SERPINB5,SFN,PML,BIRC5,SERPINE2,CDKN2A,PIK3R5,E2F1,TP53INP1,PIK3CD,DRAM1,SNAI2,TRIM29,TP53BP2,BAX,SCO2,HDAC9,PMAIP1,TP53I3,MDM4
Tryptophan Degradation X (Mammalian, via Tryptamine)	1.72E00	3.33E-01		ALDH9A1,SMOX,ALDH1A1,IL4I1,ALDH1A3,ALDH4A1
3-phosphoinositide Biosynthesis	1.72E00	1.86E-01		NUDT1,SOCS3,PIK3R5,PPP1R16B,EPHX2,PIK3CD,PPP2R5A,PPP1R14B,PIP5K1A,PTPN6,PTPN13,SIRPA,PPP1R1B,PPFIBP2,PPP1R12C,DUSP2,ALPL,PI4KB,PDXP,ACP5,NT5C,PTPRC,RASA1,NUDT15,PPFIA3,NUDT12,NUDT14,PTPN7,CDC25B
Androgen Signaling	1.71E00	1.98E-01	-0.905	GNG11,POLR2E,MRAS,CALML5,POLR2F,POLR2C,PRKACB,GTF2A1,CALR,AR,GNB1L,POLR2L,PRKCA,GNG12,PRKCB,CREBBP,PRKAR1B,GNG2,POLR2I,NCOA2,PRKAR2A,GNA15
phagosome formation	1.71E00	1.98E-01		PLCB1,FCGR1B,TLR5,PLCB2,FCGR1A,ITGA2,PIK3R5,PLCE1,FCER1G,PLCG2,MRC1,FCGR2B,INPP5D,PIK3CD,TLR3,PRKCA,PRKCB,RHOF,TLR2,RND3,RHOU,PLCL1
Wnt/Ca+ pathway	1.71E00	2.32E-01	0.277	PLCB1,PLCB2,WNT5A,WNT5B,PLCE1,DVL1,PLCG2,ATF4,CREB3L4,PRKCA,FZD8,CREBBP,PLCL1
tRNA Charging	1.71E00	2.56E-01		DARS2,YARS,CARS2,AARS,KARS,SARS2,WARS,IARS2,TARS2,FARSA
Inhibition of Matrix Metalloproteases	1.71E00	2.56E-01		MMP7,MMP3,MMP9,MMP19,SDC2,TIMP1,MMP13,MMP1,MMP24,MMP16
Leptin Signaling in Obesity	1.7E00	2.16E-01		PLCB1,SOCS3,PLCB2,ADCY5,PDE3B,PIK3R5,PLCE1,PRKACB,PLCG2,ADCY1,PIK3CD,MAP2K2,PRKAR1B,PLCL1,ADCY9,PRKAR2A
IL-10 Signaling	1.7E00	2.21E-01		CCR1,SOCS3,CD14,MAPK12,BLVRB,NFKBIE,HMOX1,IL10RA,CCR5,IL18,FCGR2B,MAP2K4,NFKBIB,MAPK11,IL33
Macropinocytosis Signaling	1.7E00	2.21E-01	-3.000	CD14,PAK1,MRAS,PIK3R5,ITGB2,CSF1R,ITGB7,PLCG2,EGF,MRC1,PIK3CD,PRKCA,PRKCB,PDGFA,HRAS
Role of JAK1 and JAK3 in γc Cytokine Signaling	1.65E00	2.22E-01		IL21R,IRS2,SOCS3,MRAS,JAK3,PIK3R5,IL2RB,IRS1,IL15RA,IL2RG,PIK3CD,IL7R,FES,HRAS
PCP pathway	1.65E00	2.22E-01	-0.905	LGR4,CELSR1,EFNB1,WNT5A,MAPK12,SDC2,WNT7B,WNT5B,DAAM1,DVL1,HSPB1,PFN1,MAP2K4,FZD8
3-phosphoinositide Degradation	1.64E00	1.86E-01		NUDT1,SOCS3,PPP1R16B,EPHX2,INPP5D,PPP2R5A,PPP1R14B,PTPN6,PTPN13,SIRPA,PPP1R1B,PPFIBP2,PPP1R12C,DUSP2,ALPL,PDXP,ACP5,INPP4B,NT5C,PTPRC,RASA1,NUDT15,PPFIA3,NUDT12,NUDT14,PTPN7,CDC25B
SAPK/JNK Signaling	1.63E00	2.02E-01	-2.357	ZAK,GNG11,MAPK12,MRAS,MAP4K1,PIK3R5,MAPK8IP2,IRS1,FCER1G,RAC2,TRADD,MAP3K9,PIK3CD,MAP2K4,MAP3K1,RAC3,LCK,GNG2,HRAS
Neuregulin Signaling	1.62E00	2.05E-01	-1.291	RPS6KB2,HBEGF,RPS6,ERBB2IP,ERBB4,PICK1,ITGA2,MRAS,BAD,PLCG2,EGF,AREG,MYC,PRKCA,MAP2K2,PRKCB,ERBB3,HRAS
Dopamine Degradation	1.61E00	2.92E-01		ALDH9A1,SMOX,COMT,ALDH1A1,IL4I1,ALDH1A3,ALDH4A1
Prostate Cancer Signaling	1.61E00	2.07E-01		SRD5A1,NKX3-1,MRAS,LEF1,PIK3R5,E2F1,NFKBIE,BAD,AR,ATF4,PIK3CD,CREB3L4,MAP2K2,NFKBIB,CREBBP,GSTP1,HRAS
Glutathione Redox Reactions I	1.61E00	3.16E-01		CLIC2,GPX3,GSTT2/GSTT2B,GPX4,GPX1,GSTT1
Ethanol Degradation IV	1.61E00	3.16E-01		CYGB,ALDH9A1,ACSL1,ALDH1A1,ALDH1A3,ALDH4A1
Myc Mediated Apoptosis Signaling	1.59E00	2.24E-01		SFN,MAPK12,MRAS,CDKN2A,PIK3R5,CYCS,BAD,MYC,PIK3CD,MAP2K4,BAX,HRAS,BID
Cell Cycle: G1/S Checkpoint Regulation	1.59E00	2.19E-01	0.302	TGFB1,RPL11,CDKN2A,E2F1,TGFB2,BTRC,CCND3,E2F4,MYC,CDKN2D,E2F2,BMI1,CDK6,HDAC9
Adipogenesis pathway	1.59E00	1.89E-01		FGFR2,FGFR3,FGFR1,CEBPD,TGFB1,FABP4,TCF7,WNT5A,RBP1,CDKN2A,CLOCK,NR2F2,SETDB1,RPS6KC1,LPIN1,SMAD5,CEBPB,FZD8,LPL,DDIT3,KLF5,FGFR4,HDAC9,BMP7
Mouse Embryonic Stem Cell Pluripotency	1.59E00	2E-01	-1.606	ID1,MAPK12,MRAS,LEF1,JAK3,PIK3R5,LIF,ID3,DVL1,IL6ST,APC,MYC,PIK3CD,SMAD5,MAP2K2,FZD8,CREBBP,MAPK11,HRAS
Tight Junction Signaling	1.57E00	1.8E-01		F11R,PARD6A,TGFB1,MPP5,YBX3,CLDN8,PPP2R3B,MPDZ,CLDN1,PRKACB,INADL,PPP2R5A,CLDN5,PRKAR1B,CNKSR3,ACTG2,HSF1,PRKAR2A,OCLN,TNFRSF1B,TGFB2,CLDN12,MYL6B,MYH10,CLDN15,MYL9,CGN,MYL6,ARHGEF2,TJP3
Hypoxia Signaling in the Cardiovascular System	1.54E00	2.15E-01		UBE2M,NFKBIE,UBE2E2,UBE2S,ATF4,CREB3L4,CDC34,NFKBIB,EDN1,CREBBP,ARNT,UBE2C,NOS3,P4HB
ATM Signaling	1.54E00	2.2E-01	-0.832	RAD50,MAPK12,CCNB2,H2AFX,ATF4,CREB3L4,MAP2K4,CREBBP,MAPK11,TP53BP1,RAD51,BID,MDM4
Purine Nucleotides Degradation II (Aerobic)	1.5E00	3E-01		ADA,AOX1,PNP,NT5C,NT5E,CECR1
IL-17 Signaling	1.49E00	2.08E-01		CXCL10,MAPK12,MRAS,PIK3R5,CXCL11,MMP3,PIK3CD,MAP2K4,CEBPB,CCL2,MAP2K2,MAPK11,TIMP1,HRAS,MUC5B
Actin Cytoskeleton Signaling	1.49E00	1.71E-01		MRAS,ITGA2,PIK3R5,RAC2,ARPC1B,APC,WAS,CFL1,ARHGEF6,PIK3CD,PFN1,RAC3,TRIO,PIP5K1A,IQGAP2,ACTG2,VAV3,CD14,PAK1,ARHGAP35,FGF7,MYL6B,MYH10,MYL9,VAV1,MYL6,EGF,GSN,NCKAP1L,CSK,MAP2K2,GNG12,FGF14,PDGFA,HRAS,TTN,TMSB10/TMSB4X
Protein Kinase A Signaling	1.49E00	1.58E-01		TGFB1,PLCB2,GNG11,PLCE1,NFKBIE,PRKACB,ADCY1,NFKBIB,PRKCB,PRKAR1B,FLNC,NOS3,PTPN13,PPP1R1B,PRKAR2A,LEF1,TGFB2,PTPRT,MYL6B,MYL9,DUSP2,ANAPC11,BAD,GNB1L,CREB3L4,MAP3K1,GNG12,AKAP9,PTPN7,PDE4A,PDE3B,CALML5,PDE4B,HHAT,PPP1R3C,PPP1R14B,CREBBP,PTPN6,SIRPA,PLCL1,AKAP5,PLCB1,SFN,ADCY5,TIMM50,GLI3,PTPN3,MYH10,PLCG2,MYL6,ATF4,PRKCA,MAP2K2,PTPRU,PTPRC,GNG2,CDKN3,TTN,ADCY9,PDE9A,CDC25B
IL-15 Signaling	1.49E00	2.12E-01		MAPK12,MRAS,JAK3,PIK3R5,IL2RB,IL15RA,IL2RG,VCAM1,PIK3CD,RAC3,LCK,MAP2K2,MAPK11,HRAS
Regulation of Actin-based Motility by Rho	1.48E00	1.98E-01	-2.500	ITGA2,PAK1,MYL6B,MYL9,WIPF1,RAC2,ARPC1B,MYL6,WAS,CFL1,PFN1,GSN,RAC3,PIP5K1A,RHOF,RND3,RHOU,ACTG2
Induction of Apoptosis by HIV1	1.48E00	2.17E-01	-1.387	TNFRSF1B,MAPK12,NFKBIE,CYCS,TRADD,BIRC3,SLC25A10,SLC25A6,MAP2K4,NFKBIB,BAX,TRAF1,BID
Role of IL-17A in Arthritis	1.48E00	2.22E-01		PIK3CD,CCL5,MAP2K4,CCL2,MAPK12,MAP2K2,NFKBIB,PIK3R5,MAPK11,NFKBIE,MMP13,MMP1
14-3-3-mediated Signaling	1.47E00	1.88E-01		PLCB1,SFN,TUBB3,PLCB2,MAPK12,TUBB6,MRAS,PIK3R5,PLCE1,BAD,PLCG2,VIM,PIK3CD,PRKCA,MAP2K4,MAP2K2,PRKCB,TUBA4A,BAX,MAPT,HRAS,PLCL1
Amyotrophic Lateral Sclerosis Signaling	1.46E00	1.94E-01		CAPN9,GLUL,SOD1,PAK1,PGF,PIK3R5,GPX1,CAPN8,CAPN10,SSR4,CYCS,BIRC3,PIK3CD,CAPN5,BAX,BID,VEGFC,CACNA1D,CAPN2
Corticotropin Releasing Hormone Signaling	1.46E00	1.89E-01		NPR1,ADCY5,MAPK12,NR4A1,CALML5,GLI3,PRKACB,PLCG2,ADCY1,ATF4,CREB3L4,PRKCA,MAP2K2,PRKCB,CREBBP,PRKAR1B,NOS3,MAPK11,MEF2D,ADCY9,PRKAR2A
Thrombin Signaling	1.46E00	1.73E-01	-2.268	ARHGEF11,PLCB2,GNG11,MRAS,PIK3R5,PLCE1,ADCY1,GATA3,ARHGEF6,PIK3CD,PRKCB,MAPK11,PLCL1,RND3,PLCB1,ADCY5,MAPK12,MYL6B,MYL9,PLCG2,GNB1L,MYL6,EGF,PRKCA,ARHGEF2,MAP2K2,GNG12,GNG2,HRAS,RHOF,RHOU,ADCY9,GNA15
NF-κB Activation by Viruses	1.45E00	2.05E-01		ITGAL,ITGA2,MRAS,PIK3R5,ITGB2,NFKBIE,CCR5,PIK3CD,PRKCA,MAP3K1,LCK,NFKBIB,PRKCB,CD4,HRAS
Ephrin B Signaling	1.45E00	2.05E-01	-1.667	EFNB1,GNG11,PAK1,MRAS,EPHB2,RAC2,VAV1,GNB1L,CFL1,RAC3,GNG12,GNG2,HRAS,GNA15,VAV3
ErbB Signaling	1.43E00	1.98E-01		HBEGF,ERBB4,MAPK12,PAK1,MRAS,PIK3R5,PLCG2,EGF,AREG,PIK3CD,PRKCA,MAP2K4,MAP2K2,PRKCB,MAPK11,ERBB3,HRAS
CDK5 Signaling	1.42E00	1.92E-01	0.471	ADCY5,ITGA2,MAPK12,MRAS,PPP2R3B,PRKACB,ADCY1,PPP1R3C,PPP2R5A,PPP1R14B,MAP2K2,PRKAR1B,MAPK11,NTRK2,MAPT,PPP1R1B,HRAS,ADCY9,PRKAR2A
FLT3 Signaling in Hematopoietic Progenitor Cells	1.4E00	2.03E-01	-1.069	MAPK12,MRAS,PIK3R5,BAD,RPS6KA5,INPP5D,ATF4,PIK3CD,CREB3L4,MAP2K2,FLT3LG,CREBBP,MAPK11,HRAS,EIF4EBP1
RhoGDI Signaling	1.39E00	1.73E-01	1.225	ARHGEF11,CDH2,GNG11,MRAS,ITGA2,ARPC1B,CFL1,ARHGEF6,PIP5K1A,CREBBP,GRIP1,RND3,ESR1,ACTG2,PAK1,ARHGAP35,MYL6B,MYL9,PPP1R12C,GNB1L,MYL6,PRKCA,ARHGEF2,GNG12,ARHGAP4,GNG2,RHOF,RHOU,ARHGAP9,GNA15
α-Adrenergic Signaling	1.38E00	1.95E-01	-0.832	GNG11,ADCY5,MRAS,CALML5,PRKACB,PLCG2,ADCY1,GNB1L,PRKCA,MAP2K2,GNG12,PRKCB,PRKAR1B,GNG2,HRAS,ADCY9,PRKAR2A
Oxidative Ethanol Degradation III	1.38E00	3.12E-01		ALDH9A1,ACSL1,ALDH1A1,ALDH1A3,ALDH4A1
Parkinson's Signaling	1.38E00	3.12E-01		PARK7,UCHL1,MAPK12,MAPK11,CYCS
GM-CSF Signaling	1.38E00	2.1E-01	-3.051	HCK,CSF2RB,CSF2RA,MRAS,PIK3R5,CISH,PIK3CD,PIM1,MAP2K2,PRKCB,ETS1,HRAS,LYN
ERK/MAPK Signaling	1.38E00	1.71E-01	-1.414	MRAS,ITGA2,PIK3R5,PPP2R3B,PRKACB,RAC2,RPS6KA5,FYN,PIK3CD,PPP1R3C,PPP2R5A,PPP1R14B,RAC3,PRKCB,PRKAR1B,CREBBP,EIF4EBP1,ESR1,PRKAR2A,RAPGEF4,PAK1,DUSP2,BAD,PLCG2,HSPB1,MYC,ATF4,PRKCA,CREB3L4,MAP2K2,ETS1,HRAS
Germ Cell-Sertoli Cell Junction Signaling	1.37E00	1.75E-01		CDH2,TGFB1,TUBB3,MRAS,ITGA2,TUBB6,PIK3R5,RAC2,CFL1,PIK3CD,RAC3,MAP3K8,RND3,ACTG2,PAK1,MAPK12,TGFB2,MAP3K9,MAP2K4,GSN,SORBS1,MAP3K1,MYO7A,MAP2K2,TUBA4A,HRAS,RHOF,RHOU
phagosome maturation	1.37E00	1.83E-01		TUBB3,ATP6V0D1,TUBB6,B2M,TCIRG1,PRDX1,TAP1,ATP6V1B1,HLA-DRA,NCF2,CALR,ATP6V1F,HLA-A,HLA-DRB1,PRDX5,HLA-DRB5,TUBA4A,HLA-C,HLA-B,CYBB,ATP6V0B,DYNC2H1
Tetrahydrobiopterin Biosynthesis I	1.36E00	6.67E-01		GCH1,PTS
Hypusine Biosynthesis	1.36E00	6.67E-01		DOHH,EIF5A
Thiosulfate Disproportionation III (Rhodanese)	1.36E00	6.67E-01		TST,MPST
Tetrahydrobiopterin Biosynthesis II	1.36E00	6.67E-01		GCH1,PTS
Role of Pattern Recognition Receptors in Recognition of Bacteria and Viruses	1.35E00	1.81E-01	-2.357	TLR5,CCL5,TGFB1,NOD2,IRF3,MAPK12,C1QB,PIK3R5,C5,TGFB2,LIF,C1QA,PLCG2,C1QC,IL18,PIK3CD,TLR3,PRKCA,MAP2K4,C5AR1,PRKCB,RNASEL,TLR2
UVA-Induced MAPK Signaling	1.34E00	1.93E-01	-1.213	RPS6KB2,PLCB1,PLCB2,MAPK12,MRAS,PIK3R5,PLCE1,CYCS,PLCG2,RPS6KA5,PARP1,PIK3CD,PRKCA,MAP2K4,MAPK11,HRAS,PLCL1
Role of MAPK Signaling in the Pathogenesis of Influenza	1.34E00	2.03E-01		CCL5,PLA2G16,CXCL10,MAPK12,MRAS,PLA2G7,PRKCA,MAP2K4,CCL2,MAP2K2,RARRES3,BAX,MAPK11,HRAS
Adenine and Adenosine Salvage III	1.33E00	4.29E-01		ADA,PNP,CECR1
Ethanol Degradation II	1.32E00	2.42E-01		ALDH9A1,HSD17B10,ACSL1,ALDH1A1,ALDH1A3,DHRS4,DHRS2,ALDH4A1
Glioma Signaling	1.32E00	1.89E-01	-2.668	MRAS,CALML5,CDKN2A,PIK3R5,E2F1,IGF2,PLCG2,E2F4,EGF,PIK3CD,PRKCA,CDKN2D,E2F2,MAP2K2,PRKCB,CDK6,PDGFA,HRAS
Wnt/β-catenin Signaling	1.31E00	1.72E-01	0.209	SOX18,CDH2,TGFB1,WNT5A,UBD,CSNK2A2,CDKN2A,SFRP1,PPP2R3B,SOX13,APC,PPP2R5A,CREBBP,BCL9,PIN1,CSNK1G1,WNT7B,LEF1,MAP4K1,WNT5B,TGFB2,BTRC,DVL1,MMP7,SOX10,MYC,FZD8,ACVR2B,GJA1
RhoA Signaling	1.3E00	1.8E-01	-1.342	SEPT8,ARHGEF11,PKN1,ARHGAP35,MYL6B,MYL9,ARPC1B,ABL2,RAPGEF6,MYL6,CDC42EP1,CFL1,PFN1,SEPT4,SEPT3,ARHGAP4,PIP5K1A,TTN,RND3,ARHGAP9,ACTG2,SEPT1
Melatonin Signaling	1.29E00	2E-01	-0.577	PLCB1,PLCB2,CALML5,PLCE1,PRKACB,PLCG2,PRKCA,MAP2K4,MAP2K2,PRKCB,PRKAR1B,RORC,PLCL1,PRKAR2A
Cellular Effects of Sildenafil (Viagra)	1.29E00	1.78E-01		PLCB1,PDE4A,PLCB2,ADCY5,PDE3B,CALML5,MYL6B,PLCE1,MYH10,MYL9,PDE4B,PRKACB,KCNN4,PLCG2,ADCY1,MYL6,PRKAR1B,NOS3,PLCL1,CACNA1D,ADCY9,ACTG2,PRKAR2A
Pyridoxal 5'-phosphate Salvage Pathway	1.28E00	2.03E-01		PKN1,PAK1,MAP3K9,GRK5,MAP2K4,SGK1,PIM1,MAP3K8,MAP2K2,PRKAA2,CDK6,FAM20B,PDXK
Superpathway of Cholesterol Biosynthesis	1.27E00	2.5E-01		EBP,IDI1,MVK,HSD17B7,GGPS1,MVD,DHCR7
Acyl-CoA Hydrolysis	1.27E00	3.33E-01		GNPAT,ACOT9,ACOT7,THEM4
IL-9 Signaling	1.25E00	2.35E-01	-1.134	PIK3CD,IRS2,SOCS3,JAK3,PIK3R5,IRS1,CISH,IL2RG
Inhibition of Angiogenesis by TSP1	1.25E00	2.35E-01	-1.134	FYN,TGFB1,MMP9,MAP2K4,SDC2,MAPK12,NOS3,MAPK11
Renal Cell Carcinoma Signaling	1.25E00	1.97E-01	-2.646	TCEB2,TGFB1,PAK1,MRAS,UBD,PIK3R5,PIK3CD,TCEB1,MAP2K2,CREBBP,ARNT,ETS1,HRAS,RBX1
IGF-1 Signaling	1.25E00	1.86E-01	-1.941	RPS6KB2,SFN,IRS2,SOCS3,MRAS,CSNK2A2,PIK3R5,IGFBP5,IRS1,PRKACB,BAD,PIK3CD,MAP2K2,PRKAR1B,RASA1,HRAS,IGFBP6,PRKAR2A
Clathrin-mediated Endocytosis Signaling	1.25E00	1.68E-01		TF,PGF,UBD,CSNK2A2,PIK3R5,AMPH,ITGB2,APOC1,ARRB2,ARPC1B,ITGB7,ARRB1,PIK3CD,HIP1,VEGFC,ACTG2,APOL1,SH3KBP1,APOD,FGF7,EPHB2,EGF,LYZ,MYO6,CLU,SERPINA1,APOE,CLTB,FGF14,AP2S1,PDGFA
Type II Diabetes Mellitus Signaling	1.24E00	1.79E-01		IRS2,SOCS3,TNFRSF1B,MAPK12,PIK3R5,IRS1,NFKBIE,TRADD,ACSL4,PIK3CD,ACSL1,PRKCA,MAP2K4,MAP3K1,CEBPB,KCNJ11,PRKAA2,NFKBIB,PRKCB,SLC27A5,PRKAB2
p38 MAPK Signaling	1.24E00	1.79E-01	-1.213	RPS6KB2,TGFB1,TNFRSF1B,MAPK12,MAP4K1,TGFB2,TRADD,HSPB1,RPS6KA5,MYC,IL18,ATF4,CREB3L4,MAP2K4,DDIT3,CREBBP,MAPK11,MAPT,MEF2D,IL33,CDC25B
VDR/RXR Activation	1.22E00	1.92E-01	-0.302	TRPV6,CCL5,CXCL10,CD14,TGFB2,IGFBP5,HR,PRKCA,CEBPB,PRKCB,NCOR1,SPP1,PDGFA,NCOA2,IGFBP6
PTEN Signaling	1.21E00	1.78E-01	1.528	FGFR2,FGFR3,RPS6KB2,FGFR1,ITGA2,MRAS,CSNK2A2,PIK3R5,RAC2,BAD,BMPR1B,INPP5D,PIK3CD,RAC3,MAP2K2,MAGI1,CNKSR3,NTRK2,FGFR4,MAGI3,HRAS
TNFR2 Signaling	1.2E00	2.41E-01	-0.378	MAP2K4,TNFRSF1B,MAP3K1,NFKBIB,TRAF1,NFKBIE,BIRC3
Pyrimidine Ribonucleotides Interconversion	1.2E00	2.41E-01		NME7,ENTPD7,AK8,AK4,NME1,NME5,NME2
nNOS Signaling in Neurons	1.2E00	2.13E-01		CAPN9,RASD1,NOS1AP,CAPN5,PRKCA,CALML5,PRKCB,CAPN8,CAPN10,CAPN2
Epithelial Adherens Junction Signaling	1.18E00	1.71E-01		FGFR1,CDH2,TUBB3,MRAS,TUBB6,ARPC1B,NOTCH2,APC,SNAI1,WAS,SNAI2,ACTG2,LEF1,TGFB2,MYL6B,MYH10,MYL9,MYL6,EGF,SORBS1,MYO7A,TUBA4A,MAGI1,HRAS,ACVR2B
Synaptic Long Term Potentiation	1.18E00	1.76E-01		PLCB1,PLCB2,MRAS,CALML5,PLCE1,PRKACB,PLCG2,ADCY1,ATF4,PPP1R3C,CREB3L4,PRKCA,PPP1R14B,MAP2K2,PRKCB,CREBBP,PRKAR1B,HRAS,PLCL1,PRKAR2A,GNA15
ErbB4 Signaling	1.17E00	2E-01	-2.333	NCSTN,PIK3CD,ERBB4,PRKCA,PSEN2,MRAS,MAP2K2,PIK3R5,PRKCB,HRAS,APH1A,PLCG2
Tryptophan Degradation to 2-amino-3-carboxymuconate Semialdehyde	1.17E00	3.75E-01		IDO1,KMO,KYNU
Purine Ribonucleosides Degradation to Ribose-1-phosphate	1.17E00	3.75E-01		ADA,PNP,CECR1
LPS-stimulated MAPK Signaling	1.16E00	1.92E-01	-3.207	CD14,MAPK12,PAK1,MRAS,PIK3R5,NFKBIE,PIK3CD,PRKCA,MAP2K4,MAP2K2,NFKBIB,PRKCB,MAPK11,HRAS
Cardiac β-adrenergic Signaling	1.16E00	1.73E-01	0.243	PDE4A,GNG11,ADCY5,PDE3B,MRAS,PPP2R3B,PDE4B,PRKACB,ADCY1,GNB1L,PPP1R3C,PPP2R5A,PPP1R14B,GNG12,PRKAR1B,GNG2,AKAP5,CACNA1D,PDE9A,AKAP9,ADCY9,PKIB,PRKAR2A
Assembly of RNA Polymerase III Complex	1.16E00	3.08E-01		GTF3A,BRF2,BDP1,GTF3C4
Oleate Biosynthesis II (Animals)	1.16E00	3.08E-01		SCD5,ALDH6A1,PTPRT,FADS1
Histamine Degradation	1.16E00	3.08E-01		ALDH9A1,ALDH1A1,ALDH1A3,ALDH4A1
Guanosine Nucleotides Degradation III	1.16E00	3.08E-01		AOX1,PNP,NT5C,NT5E
Gαq Signaling	1.15E00	1.7E-01	-3.273	PLCB2,GNG11,MRAS,PLD3,CALML5,PIK3R5,NFKBIE,PIK3CD,NFKBIB,RGS2,PRKCB,RND3,PLCB1,BTK,HMOX1,PLCG2,GNB1L,PRKCA,CSK,MAP2K2,GNG12,GNG2,RHOF,RHOU,GNA15
HMGB1 Signaling	1.15E00	1.75E-01	-2.683	TGFB1,TNFRSF1B,MAPK12,MRAS,PIK3R5,TGFB2,LIF,SELE,VCAM1,IL18,PIK3CD,MAP2K4,CCL2,MAP2K2,MAPK11,SERPINE1,HRAS,KAT6B,RHOF,RND3,RHOU
Tumoricidal Function of Hepatic Natural Killer Cells	1.15E00	2.5E-01	-2.000	ITGAL,SRGN,ENDOG,BAX,CYCS,BID
Ephrin A Signaling	1.14E00	2.08E-01		EFNA4,FYN,CFL1,PIK3CD,PAK1,PIK3R5,EFNA1,EPHA2,VAV1,VAV3
FXR/RXR Activation	1.14E00	1.73E-01		TF,APOD,MAPK12,SCARB1,APOC1,AGT,C4A/C4B,IL18,FOXA1,MAP2K4,CLU,NR1H3,LPL,SERPINA1,CREBBP,APOE,HPX,SLC27A5,FGFR4,PLTP,APOL1,IL33
TGF-β Signaling	1.13E00	1.84E-01	-1.807	TGFB1,MAPK12,MRAS,MAP4K1,TGFB2,BMPR1B,MAP2K4,SMAD5,MAP2K2,RUNX3,CREBBP,MAPK11,SERPINE1,HRAS,BMP7,ACVR2B
Gap Junction Signaling	1.12E00	1.68E-01		NPR1,PLCB2,TUBB3,MRAS,TUBB6,PIK3R5,PLCE1,PRKACB,ADCY1,PIK3CD,PRKCB,PRKAR1B,CSNK1G1,PLCL1,ACTG2,PRKAR2A,PLCB1,ADCY5,PLCG2,EGF,CAV1,PRKCA,MAP2K2,TUBA4A,HRAS,ADCY9
Toll-like Receptor Signaling	1.12E00	1.89E-01	-1.155	TLR5,CD14,MAPK12,UBD,LY96,IL18,TLR3,MAP2K4,MAP3K1,MAPK11,TRAF1,ECSIT,TLR2,IL33
Sperm Motility	1.12E00	1.74E-01	-0.894	PLCB1,PDE4A,NPR1,PLA2G16,PLCB2,MRAS,CALML5,PLCE1,MST1R,PLA2G7,PDE4B,PRKACB,FRK,SLC12A2,PLCG2,PRKCA,RARRES3,PRKCB,PRKAR1B,PLCL1,PRKAR2A
Relaxin Signaling	1.11E00	1.7E-01	-1.000	PDE4A,NPR1,MMP9,GNG11,ADCY5,PDE3B,MRAS,PIK3R5,NFKBIE,PDE4B,PRKACB,ADCY1,GNB1L,PIK3CD,NFKBIB,GNG12,PRKAR1B,GNG2,NOS3,PDE9A,ADCY9,PRKAR2A,GNA15
Role of Osteoblasts, Osteoclasts and Chondrocytes in Rheumatoid Arthritis	1.1E00	1.6E-01		TGFB1,WNT5A,ITGA2,CALML5,PIK3R5,SFRP1,NFKBIE,BIRC3,CSF1R,APC,PIK3CD,NFKBIB,SPP1,IL33,BMP7,TNFRSF1B,WNT7B,MAPK12,LEF1,WNT5B,MMP13,TRADD,DVL1,BAD,TRAF5,ALPL,MMP3,IL18,MAP2K4,SMAD5,GSN,ACP5,BMP1,FZD8,MMP1
Arsenate Detoxification I (Glutaredoxin)	1.1E00	5E-01		GSTO1,PNP
Retinoate Biosynthesis II	1.1E00	5E-01		RBP7,RBP1
Creatine-phosphate Biosynthesis	1.1E00	5E-01		CKB,CKMT1A/CKMT1B
Heme Degradation	1.1E00	5E-01		BLVRB,HMOX1
Eumelanin Biosynthesis	1.1E00	5E-01		MIF,DDT
Melatonin Degradation II	1.1E00	5E-01		SMOX,IL4I1
Hereditary Breast Cancer Signaling	1.08E00	1.71E-01		SFN,RAD50,PBRM1,POLR2E,MRAS,UBD,POLR2F,PIK3R5,E2F1,BARD1,POLR2C,H2AFX,POLR2L,PIK3CD,ARID2,FANCA,CREBBP,POLR2I,CDK6,RAD51,HDAC9,HRAS
IL-17A Signaling in Gastric Cells	1.07E00	2.4E-01		CXCL11,CCL5,CXCL10,MAP2K4,MAPK12,MAPK11
Glycolysis I	1.07E00	2.4E-01		PFKP,TPI1,ENO2,ALDOC,GAPDH,ENO1
4-1BB Signaling in T Lymphocytes	1.07E00	2.26E-01	-1.342	MAP2K4,MAPK12,MAP2K2,NFKBIB,MAPK11,TRAF1,NFKBIE
Pyrimidine Ribonucleotides De Novo Biosynthesis	1.07E00	2.26E-01		NME7,ENTPD7,AK8,AK4,NME1,NME5,NME2
Gαs Signaling	1.07E00	1.74E-01	-0.243	HCK,RAPGEF4,GNG11,ADCY5,MRAS,PTGER4,PRKACB,ADCY1,GNB1L,ATF4,CREB3L4,MAP2K2,RGS2,GNG12,CREBBP,PRKAR1B,GNG2,ADCY9,PRKAR2A
EGF Signaling	1.06E00	1.96E-01	-1.508	EGF,PIK3CD,PRKCA,MAP2K4,MAP3K1,MAPK12,CSNK2A2,PIK3R5,RASA1,MAPK11,HRAS
IL-6 Signaling	1.06E00	1.72E-01	-2.065	MCL1,SOCS3,CD14,TNFRSF1B,MAPK12,MRAS,CSNK2A2,PIK3R5,NFKBIE,IL6ST,HSPB1,IL18,PIK3CD,MAP2K4,CEBPB,MAP2K2,NFKBIB,MAPK11,HRAS,IL33
PAK Signaling	1.06E00	1.8E-01	-2.324	ARHGAP10,ITGA2,MAPK12,PAK1,MRAS,PIK3R5,MYL6B,MYL9,MYL6,CFL1,ARHGEF6,PIK3CD,MAP2K4,MAP2K2,PDGFA,HRAS
PI3K/AKT Signaling	1.06E00	1.71E-01	-1.886	RPS6KB2,SFN,GDF15,MCL1,ITGA2,MRAS,JAK3,CDC37,PPP2R3B,NFKBIE,BAD,THEM4,INPP5D,PIK3CD,PPP2R5A,MAP3K8,MAP2K2,NFKBIB,NOS3,HRAS,EIF4EBP1
Urate Biosynthesis/Inosine 5'-phosphate Degradation	1.05E00	2.86E-01		AOX1,PNP,NT5C,NT5E
Vitamin-C Transport	1.05E00	2.86E-01		GSTO1,NXN,SLC2A3,TXN
HER-2 Signaling in Breast Cancer	1.05E00	1.84E-01		PARD6A,MRAS,PIK3R5,ITGB2,BAD,ITGB7,EGF,AREG,PIK3CD,PRKCA,PRKCB,CDK6,ERBB3,HRAS
BMP signaling pathway	1.05E00	1.84E-01		MAPK12,MRAS,PRKACB,BMPR1B,MAP2K4,SMAD5,BMP1,MAP2K2,CREBBP,PRKAR1B,MAPK11,HRAS,BMP7,PRKAR2A
Prostanoid Biosynthesis	1.03E00	3.33E-01		PTGES2,PTGDS,PTGES
Folate Transformations I	1.03E00	3.33E-01		MTR,MTHFD1L,MTHFD2L
Role of IL-17F in Allergic Inflammatory Airway Diseases	1.03E00	2.05E-01		RPS6KA5,ATF4,CREB3L4,CXCL10,CCL2,MAP2K2,CREBBP,CCL4,MMP13
iNOS Signaling	1.03E00	2.05E-01	-2.121	LY96,CD14,MAPK12,CALML5,JAK3,NFKBIB,CREBBP,MAPK11,NFKBIE
April Mediated Signaling	1.02E00	2.11E-01	0.707	MAP2K4,MAP3K1,MAPK12,NFKBIB,MAPK11,TRAF1,NFKBIE,TRAF5
Tryptophan Degradation III (Eukaryotic)	1.02E00	2.5E-01		HSD17B10,HSD17B4,IDO1,KMO,KYNU
Rac Signaling	1.01E00	1.73E-01	-0.943	PARD6A,ITGA2,PAK1,MRAS,PIK3R5,SH3RF1,ELK4,ARPC1B,NCF2,CFL1,PIK3CD,MAP2K4,MAP3K1,MAP2K2,PIP5K1A,IQGAP2,HRAS,CYBB
IL-3 Signaling	9.87E-01	1.83E-01	-1.941	CSF2RB,PAK1,MRAS,PIK3R5,BAD,IL3RA,INPP5D,PIK3CD,PRKCA,MAP2K2,PRKCB,PTPN6,HRAS
GPCR-Mediated Integration of Enteroendocrine Signaling Exemplified by an L Cell	9.87E-01	1.83E-01		PLCB1,PLCB2,ADCY5,PLCE1,PRKACB,PLCG2,ADCY1,PRKAR1B,GRPR,PLCL1,ADCY9,PRKAR2A,GNA15
Role of Hypercytokinemia/hyperchemokinemia in the Pathogenesis of Influenza	9.82E-01	2E-01		CCR5,IL18,CCL3,CCL5,CCR1,CXCL10,CCL2,CCL4,IL33
Cyclins and Cell Cycle Regulation	9.75E-01	1.79E-01		TGFB1,CDKN2A,E2F1,TGFB2,PPP2R3B,BTRC,CCNB2,CCND3,E2F4,PPP2R5A,CDKN2D,E2F2,CDK6,HDAC9
Dopamine-DARPP32 Feedback in cAMP Signaling	9.74E-01	1.61E-01	0.408	PLCB2,CALML5,PPP2R3B,PLCE1,PRKACB,ADCY1,PPP1R3C,PPP2R5A,PPP1R14B,PRKCB,PRKAR1B,KCNJ8,CREBBP,CSNK1G1,PPP1R1B,PLCL1,CACNA1D,PRKAR2A,PLCB1,ADCY5,PLCG2,ATF4,PRKCA,CREB3L4,KCNJ11,ADCY9
CD40 Signaling	9.63E-01	1.85E-01	-1.155	PIK3CD,MAP2K4,MAPK12,MAP2K2,JAK3,NFKBIB,PIK3R5,MAPK11,TRAF1,CD40,NFKBIE,TRAF5
NAD biosynthesis II (from tryptophan)	9.62E-01	2.67E-01		QPRT,IDO1,KMO,KYNU
Methylglyoxal Degradation III	9.62E-01	2.67E-01		AKR7A3,AKR1C3,AKR1B1,AKR1C1/AKR1C2
VEGF Signaling	9.6E-01	1.74E-01	-1.604	SFN,MRAS,PGF,PIK3R5,BAD,PLCG2,PIK3CD,PRKCA,MAP2K2,PRKCB,ARNT,PTPN6,NOS3,HRAS,VEGFC,ACTG2
Retinoate Biosynthesis I	9.51E-01	2.12E-01		DHRS3,AKR1C3,RBP7,ALDH1A1,RBP1,ALDH1A3,DHRS4
Human Embryonic Stem Cell Pluripotency	9.46E-01	1.64E-01		FGFR2,FGFR3,FGFR1,TGFB1,WNT5A,WNT7B,MRAS,LEF1,WNT5B,PIK3R5,TGFB2,SPHK1,DVL1,APC,PIK3CD,SMAD5,BMP1,FZD8,NTRK2,FGFR4,PDGFA,BMP7
Endoplasmic Reticulum Stress Pathway	9.43E-01	2.38E-01		CALR,ATF4,DDIT3,ERN1,ATF6
Cell Cycle Control of Chromosomal Replication	9.43E-01	2.22E-01		MCM7,CDC45,ORC6,CDT1,CDK6,MCM5
D-myo-inositol (1,4,5)-Trisphosphate Biosynthesis	9.43E-01	2.22E-01		PLCB1,PI4KB,PLCB2,PIP5K1A,PLCE1,PLCG2
Role of Oct4 in Mammalian Embryonic Stem Cell Pluripotency	9.36E-01	1.96E-01		REST,FAM208A,PARP1,FOXA1,PHB,BMI1,SPP1,NR2F2,KDM5B
MSP-RON Signaling Pathway	9.36E-01	1.96E-01		PIK3CD,CSF2RB,CCL2,PIK3R5,MST1R,ITGB2,TLR2,IL3RA,ACTG2
Angiopoietin Signaling	9.25E-01	1.82E-01	-1.897	PIK3CD,DOK2,PAK1,MRAS,NFKBIB,BIRC5,PIK3R5,NOS3,RASA1,NFKBIE,HRAS,BAD
NGF Signaling	9.22E-01	1.68E-01	-0.943	RPS6KB2,MAPK12,MRAS,PIK3R5,MAP3K9,PLCG2,RPS6KA5,ATF4,PIK3CD,CREB3L4,MAP2K4,MAP3K1,MAP3K8,TRIO,MAP2K2,CREBBP,BAX,HRAS
eNOS Signaling	9.22E-01	1.62E-01	-0.688	ADCY5,CALML5,PGF,PIK3R5,NOSTRIN,PRKACB,AQP1,NOSIP,PLCG2,ADCY1,CAV1,PIK3CD,PRKCA,PRKAA2,PRKCB,STUB1,PRKAR1B,NOS3,VEGFC,ESR1,ADCY9,PRKAB2,PRKAR2A
Role of PKR in Interferon Induction and Antiviral Response	9.16E-01	2E-01		TLR3,FCGR1A,NFKBIB,NFKBIE,CYCS,BID,RNASEL,TRAF5
B Cell Activating Factor Signaling	9.16E-01	2E-01	0.000	MAP2K4,MAP3K1,MAPK12,NFKBIB,MAPK11,TRAF1,NFKBIE,TRAF5
UVB-Induced MAPK Signaling	9.15E-01	1.89E-01	-1.897	RPS6KA5,PIK3CD,PRKCA,MAP2K4,MAPK12,PIK3R5,PRKCB,MAPK11,EIF4EBP1,BAD
IL-2 Signaling	9.15E-01	1.89E-01	-3.000	PIK3CD,LCK,MRAS,CSNK2A2,MAP2K2,JAK3,PIK3R5,IL2RB,HRAS,IL2RG
Pentose Phosphate Pathway (Oxidative Branch)	9.15E-01	4E-01		G6PD,PGLS
Tetrahydrofolate Salvage from 5,10-methenyltetrahydrofolate	9.15E-01	4E-01		MTHFD1L,MTHFD2L
Ceramide Biosynthesis	9.15E-01	4E-01		SPTLC2,SPTLC3
Trans, trans-farnesyl Diphosphate Biosynthesis	9.15E-01	4E-01		IDI1,GGPS1
Citrulline-Nitric Oxide Cycle	9.15E-01	4E-01		ASS1,NOS3
Galactose Degradation I (Leloir Pathway)	9.15E-01	4E-01		GALK1,GALM
Glutamine Biosynthesis I	9.01E-01	1E00		GLUL
Xanthine and Xanthosine Salvage	9.01E-01	1E00		PNP
Methylglyoxal Degradation VI	9.01E-01	1E00		LDHD
Asparagine Biosynthesis I	9.01E-01	1E00		ASNS
PPAR Signaling	8.98E-01	1.7E-01	3.000	AIP,TNFRSF1B,MRAS,NFKBIE,SCAND1,CITED2,IL18,NR1H3,MAP2K2,NFKBIB,CREBBP,NCOR1,PDGFA,HRAS,IL33,NRIP1
TWEAK Signaling	8.98E-01	2.06E-01	0.378	NFKBIB,TRAF1,NFKBIE,TRADD,CYCS,BID,BIRC3
Paxillin Signaling	8.96E-01	1.68E-01	-1.732	ITGAL,ITGA2,MAPK12,PAK1,MRAS,ITGAE,PIK3R5,ITGAX,ITGB2,ITGB7,ARHGEF6,PIK3CD,MAP2K4,CSK,MAPK11,HRAS,ACTG2
Erythropoietin Signaling	8.89E-01	1.79E-01		PIK3CD,PRKCA,SOCS3,MRAS,MAP2K2,NFKBIB,PIK3R5,PRKCB,PTPN6,NFKBIE,HRAS,PLCG2
Endothelin-1 Signaling	8.86E-01	1.57E-01	-3.530	PLCB2,PLA2G16,MRAS,PLD3,PIK3R5,PLCE1,PLA2G7,ADCY1,PIK3CD,EDN1,PRKCB,NOS3,MAPK11,PLCL1,ECE2,PLCB1,CASP10,ADCY5,MAPK12,HMOX1,PLCG2,MYC,PRKCA,RARRES3,HRAS,ADCY9,GNA15
Granzyme B Signaling	8.8E-01	2.5E-01	-1.000	PARP1,ENDOG,CYCS,BID
Extrinsic Prothrombin Activation Pathway	8.8E-01	2.5E-01	1.000	PROS1,TFPI,F7,F3
Fatty Acid α-oxidation	8.8E-01	2.5E-01		ALDH9A1,ALDH1A1,ALDH1A3,ALDH4A1
RANK Signaling in Osteoclasts	8.72E-01	1.7E-01		MAPK12,CALML5,PIK3R5,NFKBIE,MAP3K9,TRAF5,BIRC3,PIK3CD,MAP2K4,GSN,MAP3K1,MAP3K8,MAP2K2,NFKBIB,MAPK11
MIF Regulation of Innate Immunity	8.7E-01	1.95E-01	-2.121	LY96,CD74,MAP2K4,CD14,MAPK12,NFKBIB,NFKBIE,MIF
Sphingosine-1-phosphate Signaling	8.67E-01	1.65E-01	-1.807	PLCB1,CASP10,PLCB2,ADCY5,ASAH1,PIK3R5,PLCE1,ACER2,SPHK1,PLCG2,ADCY1,PIK3CD,PDGFA,RHOF,RND3,RHOU,PLCL1,ADCY9
Coagulation System	8.48E-01	2E-01	1.134	PROS1,TFPI,F7,PLAUR,SERPINA1,F3,SERPINE1
Stearate Biosynthesis I (Animals)	8.48E-01	2E-01		ACSL4,ACSL1,SLC27A5,GNPAT,ACOT9,ACOT7,THEM4
Nucleotide Excision Repair Pathway	8.48E-01	2E-01		ERCC4,POLR2L,POLR2E,POLR2F,POLR2C,POLR2I,ERCC6
Gα12/13 Signaling	8.42E-01	1.62E-01	-1.698	CDH2,MAPK12,MRAS,BTK,PIK3R5,MYL6B,MYL9,NFKBIE,VAV1,MYL6,PIK3CD,MAP2K4,MAP3K1,MAP2K2,NFKBIB,RASA1,MEF2D,HRAS,VAV3
Thrombopoietin Signaling	8.37E-01	1.82E-01	-3.162	MYC,PIK3CD,IRS2,PRKCA,MRAS,MAP2K2,PIK3R5,PRKCB,HRAS,PLCG2
Estrogen-Dependent Breast Cancer Signaling	8.27E-01	1.77E-01		HSD17B10,ATF4,PIK3CD,CREB3L4,MRAS,HSD17B4,HSD17B7,PIK3R5,CREBBP,HRAS,ESR1
Melanoma Signaling	8.25E-01	1.9E-01		PIK3CD,MRAS,MAP2K2,CDKN2A,E2F1,PIK3R5,HRAS,BAD
UVC-Induced MAPK Signaling	8.25E-01	1.9E-01	-2.121	PRKCA,MAP2K4,MRAS,MAPK12,MAP2K2,PRKCB,MAPK11,HRAS
Pentose Phosphate Pathway	8.2E-01	2.73E-01		TKT,G6PD,PGLS
Role of NANOG in Mammalian Embryonic Stem Cell Pluripotency	8.15E-01	1.62E-01	-1.342	WNT5A,WNT7B,MRAS,JAK3,WNT5B,PIK3R5,LIF,DVL1,IL6ST,BMPR1B,APC,PIK3CD,SMAD5,BMP1,MAP2K2,FZD8,HRAS,BMP7
Differential Regulation of Cytokine Production in Intestinal Epithelial Cells by IL-17A and IL-17F	8.14E-01	2.17E-01		CCL3,CCL5,CCL2,CCL4,LCN2
TNFR1 Signaling	8.1E-01	1.84E-01	-1.000	MAP2K4,PAK1,MAP3K1,NFKBIB,NFKBIE,TRADD,CYCS,BID,BIRC3
Cell Cycle: G2/M DNA Damage Checkpoint Regulation	8.1E-01	1.84E-01	-0.707	SFN,PKMYT1,AURKA,CDKN2A,BTRC,CKS2,CCNB2,CDC25B,MDM4
γ-linolenate Biosynthesis II (Animals)	8.07E-01	2.35E-01		ACSL4,ACSL1,FADS1,SLC27A5
Superpathway of Geranylgeranyldiphosphate Biosynthesis I (via Mevalonate)	8.07E-01	2.35E-01		IDI1,MVK,GGPS1,MVD
Actin Nucleation by ARP-WASP Complex	8E-01	1.79E-01	-1.000	WAS,ITGA2,MRAS,WIPF1,PPP1R12C,HRAS,RHOF,RND3,ARPC1B,RHOU
Hepatic Cholestasis	7.93E-01	1.54E-01		TGFB1,SLCO3A1,NFKBIE,PRKACB,ATP8B1,ADCY1,LY96,NFKBIB,NR1H3,PRKCB,PRKAR1B,FGFR4,ESR1,IL33,PRKAR2A,ADCY5,TNFRSF1B,CD14,MAPK12,TGFB2,LIF,IL18,PRKCA,MAP2K4,ADCY9
Antiproliferative Role of Somatostatin Receptor 2	7.93E-01	1.75E-01	-2.828	GNB1L,PIK3CD,NPR1,GNG11,MRAS,MAP2K2,PIK3R5,GNG12,PTPN6,GNG2,HRAS
HGF Signaling	7.87E-01	1.62E-01	-1.500	ITGA2,MAPK12,PAK1,MRAS,CDKN2A,PIK3R5,MAP3K9,PLCG2,PIK3CD,PRKCA,MAP2K4,MAP3K1,MAP3K8,MAP2K2,PRKCB,ETS1,HRAS
Glutathione-mediated Detoxification	7.78E-01	2E-01		GSTO1,GSTT2/GSTT2B,GSTM2,GSTM3,GSTP1,GSTT1
Sonic Hedgehog Signaling	7.78E-01	2E-01		GLI3,PRKAR1B,PRKACB,ARRB2,STK36,PRKAR2A
Insulin Receptor Signaling	7.76E-01	1.57E-01		RPS6KB2,IRS2,SOCS3,PDE3B,MRAS,PIK3R5,IRS1,PRKACB,BAD,FYN,INPP5D,PIK3CD,PPP1R3C,SGK1,PPP1R14B,STXBP4,MAP2K2,PRKAR1B,HRAS,EIF4EBP1,PRKAR2A
Thioredoxin Pathway	7.75E-01	3.33E-01		NXN,TXN
Ceramide Degradation	7.75E-01	3.33E-01		ASAH1,ACER2
Glioma Invasiveness Signaling	7.64E-01	1.75E-01	-1.897	PIK3CD,MMP9,MRAS,PLAUR,PIK3R5,TIMP1,HRAS,RHOF,RND3,RHOU
Regulation of Cellular Mechanics by Calpain Protease	7.64E-01	1.75E-01	0.333	EGF,CAPN9,CAPN5,ITGA2,MRAS,CAPN8,CDK6,CAPN10,HRAS,CAPN2
Glutamate Receptor Signaling	7.64E-01	1.75E-01		HOMER1,HOMER3,GLUL,PICK1,GNG11,CALML5,SLC1A1,GRIP1,GNG2,SLC1A3
Activation of IRF by Cytosolic Pattern Recognition Receptors	7.6E-01	1.72E-01	-0.302	MAP2K4,IRF3,MAPK12,ISG15,NFKBIB,ADAR,CREBBP,CD40,PPIB,NFKBIE,PIN1
Small Cell Lung Cancer Signaling	7.57E-01	1.69E-01		PIAS3,MYC,PIK3CD,NFKBIB,E2F1,PIK3R5,TRAF1,NFKBIE,CDK6,CYCS,BID,TRAF5
Estrogen-mediated S-phase Entry	7.56E-01	2.08E-01	-1.342	E2F4,MYC,E2F2,E2F1,ESR1
Differential Regulation of Cytokine Production in Macrophages and T Helper Cells by IL-17A and IL-17F	7.4E-01	2.22E-01		CCL3,CCL5,CCL2,CCL4
Valine Degradation I	7.4E-01	2.22E-01		BCAT1,ACADSB,ALDH6A1,ABAT
Chronic Myeloid Leukemia Signaling	7.31E-01	1.61E-01		TGFB1,MRAS,CDKN2A,PIK3R5,E2F1,TGFB2,BAD,E2F4,MYC,PIK3CD,E2F2,MAP2K2,CDK6,HDAC9,HRAS
Phospholipases	7.3E-01	1.72E-01		PLCB1,PLA2G16,PLCB2,PLD3,RARRES3,PLCE1,PLA2G7,HMOX1,PLCL1,PLCG2
Non-Small Cell Lung Cancer Signaling	7.28E-01	1.69E-01	-1.667	EGF,PIK3CD,PRKCA,MRAS,MAP2K2,CDKN2A,E2F1,PIK3R5,CDK6,HRAS,BAD
Basal Cell Carcinoma Signaling	7.27E-01	1.67E-01		KIF7,WNT5A,WNT7B,LEF1,BMP1,WNT5B,FZD8,GLI3,STK36,DVL1,BMP7,APC
Role of JAK family kinases in IL-6-type Cytokine Signaling	7.04E-01	2E-01		MAP2K4,SOCS3,MAPK12,MAPK11,IL6ST
Gluconeogenesis I	7.04E-01	2E-01		ENO2,ME1,ALDOC,GAPDH,ENO1
CCR3 Signaling in Eosinophils	6.73E-01	1.54E-01		PLCB1,PLCB2,GNG11,MAPK12,PAK1,MRAS,CALML5,PIK3R5,GNB1L,CFL1,PIK3CD,PRKCA,MAP2K2,GNG12,PRKCB,GNG2,MAPK11,HRAS
Neurotrophin/TRK Signaling	6.68E-01	1.64E-01	-1.000	ATF4,PIK3CD,CREB3L4,MAP2K4,MRAS,FRS2,MAP2K2,PIK3R5,CREBBP,NTRK2,HRAS
Semaphorin Signaling in Neurons	6.67E-01	1.7E-01		FYN,CFL1,PAK1,SEMA7A,CRMP1,FES,RHOF,RND3,RHOU
Fatty Acid Activation	6.62E-01	2.31E-01		ACSL4,ACSL1,SLC27A5
Cholesterol Biosynthesis I	6.62E-01	2.31E-01		EBP,HSD17B7,DHCR7
Mevalonate Pathway I	6.62E-01	2.31E-01		IDI1,MVK,MVD
Bile Acid Biosynthesis, Neutral Pathway	6.62E-01	2.31E-01		AKR1C3,AKR1C1/AKR1C2,SLC27A5
Cholesterol Biosynthesis II (via 24,25-dihydrolanosterol)	6.62E-01	2.31E-01		EBP,HSD17B7,DHCR7
Cholesterol Biosynthesis III (via Desmosterol)	6.62E-01	2.31E-01		EBP,HSD17B7,DHCR7
Lipid Antigen Presentation by CD1	6.55E-01	1.92E-01		CALR,CD3E,B2M,FCER1G,AP2S1
NAD Salvage Pathway II	6.55E-01	1.92E-01		ACP6,ACP5,NT5C,NT5E,NUDT12
MIF-mediated Glucocorticoid Regulation	6.42E-01	1.82E-01	-2.449	LY96,CD74,CD14,NFKBIB,NFKBIE,MIF
AMPK Signaling	6.39E-01	1.49E-01	-0.832	PFKP,IRS2,PBRM1,PFKFB3,AK8,MAPK12,MRAS,AK4,PIK3R5,PPP2R3B,IRS1,PRKACB,PIK3CD,PPP2R5A,ARID2,PRKAA2,PRKAR1B,NOS3,MAPK11,EIF4EBP1,PRKAB2,PRKAR2A
Thyroid Cancer Signaling	6.37E-01	1.75E-01		MYC,CXCL10,MRAS,LEF1,MAP2K2,NTRK2,HRAS
Unfolded protein response	6.35E-01	1.67E-01		CALR,CEBPD,ATF4,CEBPB,DDIT3,SEL1L,ERN1,ATF6,P4HB
Guanine and Guanosine Salvage I	6.28E-01	5E-01		PNP
Proline Degradation	6.28E-01	5E-01		ALDH4A1
L-DOPA Degradation	6.28E-01	5E-01		COMT
Alanine Degradation III	6.28E-01	5E-01		GPT2
Alanine Biosynthesis II	6.28E-01	5E-01		GPT2
L-cysteine Degradation III	6.28E-01	5E-01		MPST
4-hydroxyproline Degradation I	6.28E-01	5E-01		ALDH4A1
Glycine Degradation (Creatine Biosynthesis)	6.28E-01	5E-01		GATM
Cysteine Biosynthesis/Homocysteine Degradation	6.28E-01	5E-01		CBS/LOC102724560
Threonine Degradation II	6.28E-01	5E-01		GCAT
Growth Hormone Signaling	6.12E-01	1.59E-01	-0.632	RPS6KB2,RPS6KA5,PIK3CD,PRKCA,SOCS3,PIK3R5,PRKCB,IRS1,PTPN6,IGF2,PLCG2
DNA Double-Strand Break Repair by Homologous Recombination	5.96E-01	2.14E-01		RAD50,RAD51,ATRX
DNA Double-Strand Break Repair by Non-Homologous End Joining	5.96E-01	2.14E-01		LIG3,PARP1,RAD50
Isoleucine Degradation I	5.96E-01	2.14E-01		BCAT1,HSD17B10,ACADSB
Airway Pathology in Chronic Obstructive Pulmonary Disease	5.76E-01	2.5E-01		MMP9,MMP1
Sphingosine and Sphingosine-1-phosphate Metabolism	5.76E-01	2.5E-01		ASAH1,ACER2
Histidine Degradation III	5.76E-01	2.5E-01		MTHFD1L,MTHFD2L
TR/RXR Activation	5.75E-01	1.53E-01		PFKP,PDE3B,PIK3R5,SCARB1,SLC16A3,AKR1C3,THRSP,PIK3CD,ME1,AKR1C1/AKR1C2,NCOR1,ENO1,NCOA2
Aldosterone Signaling in Epithelial Cells	5.68E-01	1.45E-01		PLCB1,PLCB2,CRYAB,HSCB,DNAJC16,HSPB8,HSPD1,PIK3R5,PLCE1,HSPE1,SLC12A2,PLCG2,HSPB1,PIK3CD,PRKCA,SGK1,MAP2K2,PIP5K1A,PRKCB,DNAJC22,PLCL1,HSPB6
Nitric Oxide Signaling in the Cardiovascular System	5.68E-01	1.5E-01	-2.324	PDE3B,CALML5,PGF,PIK3R5,PRKACB,CAV1,PIK3CD,PRKCA,MAP2K2,PRKCB,PRKAR1B,NOS3,VEGFC,CACNA1D,PRKAR2A
Cell Cycle Regulation by BTG Family Proteins	5.66E-01	1.71E-01		E2F4,BTG2,PPP2R5A,E2F2,E2F1,PPP2R3B
Role of JAK2 in Hormone-like Cytokine Signaling	5.66E-01	1.71E-01		IRS2,PRLR,SOCS3,IRS1,PTPN6,SIRPA
IL-17A Signaling in Airway Cells	5.54E-01	1.56E-01		PIK3CD,MAP2K4,MAPK12,MAP2K2,JAK3,NFKBIB,PIK3R5,MAPK11,NFKBIE,MUC5B
Serotonin Degradation	5.54E-01	1.56E-01		ALDH9A1,HSD17B10,SMOX,ALDH1A1,B3GAT3,IL4I1,ALDH1A3,DHRS4,DHRS2,ALDH4A1
Eicosanoid Signaling	5.54E-01	1.56E-01		PTGES2,AKR1C3,PTGDS,GGT1,PLA2G16,ALOX15B,RARRES3,PLA2G7,PTGER4,PTGES
HIPPO signaling	5.52E-01	1.51E-01	1.414	LATS1,AMOT,SFN,PPP2R3B,BTRC,RASSF6,INADL,TEAD4,PPP1R3C,PPP2R5A,SMAD5,PPP1R14B,TP53BP2
Cholecystokinin/Gastrin-mediated Signaling	5.47E-01	1.49E-01	-1.807	PLCB1,PLCB2,MAPK12,MRAS,IL18,PRKCA,MAP2K4,MAP2K2,PRKCB,MEF2D,HRAS,RHOF,RND3,RHOU,IL33
ErbB2-ErbB3 Signaling	5.47E-01	1.58E-01		MYC,PIK3CD,MRAS,MAP2K2,JAK3,PIK3R5,ERBB3,HRAS,BAD
nNOS Signaling in Skeletal Muscle Cells	5.39E-01	2E-01		CALML5,DAG1,DMD
Androgen Biosynthesis	5.39E-01	2E-01		EBP,AKR1C3,SRD5A1
The Visual Cycle	5.39E-01	2E-01		DHRS3,RBP7,RBP1
γ-glutamyl Cycle	5.39E-01	2E-01		GGT5,GGT1,GSS
JAK/Stat Signaling	5.37E-01	1.53E-01	-2.111	PIAS3,PIK3CD,SOCS3,MRAS,CEBPB,MAP2K2,JAK3,PIK3R5,PTPN6,CISH,HRAS
Polyamine Regulation in Colon Cancer	5.29E-01	1.82E-01		MYC,OAZ1,PSME2,APC
Ceramide Signaling	5.22E-01	1.5E-01	-0.577	PIK3CD,PPP2R5A,MAP2K4,TNFRSF1B,MAP3K1,MRAS,PIK3R5,PPP2R3B,SPHK1,CYCS,HRAS,BAD
Serotonin Receptor Signaling	5.05E-01	1.59E-01		ADCY1,GCH1,SMOX,ADCY5,PTS,IL4I1,ADCY9
Assembly of RNA Polymerase I Complex	5.02E-01	2.22E-01		TAF1C,TAF1A
Phosphatidylethanolamine Biosynthesis II	5.02E-01	2.22E-01		CHKB,PCYT2
Leucine Degradation I	5.02E-01	2.22E-01		BCAT1,MCCC2
Fatty Acid β-oxidation I	4.92E-01	1.67E-01		ACSL4,HSD17B10,ACSL1,HSD17B4,SLC27A5
Role of p14/p19ARF in Tumor Suppression	4.92E-01	1.67E-01	1.000	PIK3CD,NPM3,CDKN2A,E2F1,PIK3R5
CNTF Signaling	4.86E-01	1.54E-01	-1.414	RPS6KB2,RPS6KA5,PIK3CD,MRAS,MAP2K2,PIK3R5,HRAS,IL6ST
Endometrial Cancer Signaling	4.86E-01	1.54E-01		MYC,PIK3CD,MRAS,LEF1,MAP2K2,PIK3R5,HRAS,BAD
Estrogen Receptor Signaling	4.83E-01	1.42E-01		POLR2E,MRAS,POLR2F,POLR2C,PGR,GTF2A1,POLR2L,MAP2K2,CREBBP,MED12,MED10,NCOR1,POLR2I,HRAS,NCOA2,ESR1,TAF5L,NRIP1
GABA Receptor Signaling	4.81E-01	1.49E-01		ADCY1,ALDH9A1,ADCY5,MRAS,UBD,GABRP,AP2S1,KCNN4,ABAT,ADCY9
L-carnitine Biosynthesis	4.8E-01	3.33E-01		ALDH9A1
NADH Repair	4.8E-01	3.33E-01		GAPDH
Methylglyoxal Degradation I	4.8E-01	3.33E-01		HAGHL
Glutathione Biosynthesis	4.8E-01	3.33E-01		GSS
Ascorbate Recycling (Cytosolic)	4.8E-01	3.33E-01		GSTO1
D-glucuronate Degradation I	4.8E-01	3.33E-01		DCXR
Methionine Salvage II (Mammalian)	4.8E-01	3.33E-01		MTR
Inosine-5'-phosphate Biosynthesis II	4.8E-01	3.33E-01		ADSL
Spermidine Biosynthesis I	4.8E-01	3.33E-01		SRM
Glycerol-3-phosphate Shuttle	4.8E-01	3.33E-01		GPD2
Oxidized GTP and dGTP Detoxification	4.8E-01	3.33E-01		NUDT1
4-aminobutyrate Degradation I	4.8E-01	3.33E-01		ABAT
N-acetylglucosamine Degradation I	4.8E-01	3.33E-01		AMDHD2
Notch Signaling	4.67E-01	1.58E-01	2.236	NCSTN,MFNG,PSEN2,HEY2,NOTCH2,APH1A
IL-22 Signaling	4.49E-01	1.67E-01	0.000	MAP2K4,SOCS3,MAPK12,MAPK11
VEGF Family Ligand-Receptor Interactions	4.49E-01	1.45E-01	-3.317	PIK3CD,PRKCA,MRAS,MAP2K2,PGF,PIK3R5,PRKCB,NOS3,HRAS,VEGFC,PLCG2
Telomerase Signaling	4.43E-01	1.41E-01	-2.309	MRAS,PIK3R5,E2F1,IL2RB,PPP2R3B,IL2RG,EGF,MYC,PIK3CD,PPP2R5A,MAP2K2,ETS1,HDAC9,HRAS
RAN Signaling	4.41E-01	1.76E-01		RANGAP1,RCC1,RANBP1
Mitochondrial L-carnitine Shuttle Pathway	4.41E-01	1.76E-01		ACSL4,ACSL1,SLC27A5
Docosahexaenoic Acid (DHA) Signaling	4.38E-01	1.54E-01		PIK3CD,PIK3R5,BAX,CYCS,BID,BAD
Netrin Signaling	4.38E-01	1.54E-01		RAC3,PRKAR1B,PRKACB,RAC2,ENAH,PRKAR2A
Lymphotoxin β Receptor Signaling	4.36E-01	1.48E-01	-1.890	PIK3CD,PIK3R5,CREBBP,TRAF1,CYCS,VCAM1,TRAF5,LTB
Factors Promoting Cardiogenesis in Vertebrates	4.33E-01	1.41E-01		TGFB1,LEF1,TGFB2,DVL1,BMPR1B,APC,PRKCA,SMAD5,BMP1,FZD8,PRKCB,BMP7,ACVR2B
Death Receptor Signaling	4.33E-01	1.41E-01	0.277	CASP10,TNFRSF1B,NFKBIE,CYCS,TRADD,BIRC3,HSPB1,PARP1,MAP2K4,NFKBIB,TNFSF10,BID,ACTG2
Neuropathic Pain Signaling In Dorsal Horn Neurons	4.26E-01	1.4E-01	-1.604	PLCB1,PLCB2,PIK3R5,PLCE1,PRKACB,KCNN4,PLCG2,PIK3CD,PRKCA,PRKCB,PRKAR1B,NTRK2,PLCL1,PRKAR2A
D-myo-inositol (1,4,5)-trisphosphate Degradation	4E-01	1.67E-01		INPP5D,INPP1,IMPA2
PEDF Signaling	3.97E-01	1.41E-01	-2.121	SOD2,PIK3CD,TCF7,MRAS,MAPK12,NFKBIB,PIK3R5,MAPK11,NFKBIE,HRAS
Circadian Rhythm Signaling	3.97E-01	1.52E-01		ATF4,CREB3L4,PER1,CREBBP,CLOCK
Glutaryl-CoA Degradation	3.87E-01	1.82E-01		HSD17B10,HSD17B4
Mechanisms of Viral Exit from Host Cells	3.85E-01	1.46E-01		VPS4A,SNF8,PRKCA,PRKCB,CHMP6,ACTG2
Heme Biosynthesis from Uroporphyrinogen-III I	3.82E-01	2.5E-01		PPOX
Spermine and Spermidine Degradation I	3.82E-01	2.5E-01		SMOX
Myo-inositol Biosynthesis	3.82E-01	2.5E-01		IMPA2
Geranylgeranyldiphosphate Biosynthesis	3.82E-01	2.5E-01		GGPS1
Biotin-carboxyl Carrier Protein Assembly	3.82E-01	2.5E-01		BTD
Arginine Degradation I (Arginase Pathway)	3.82E-01	2.5E-01		ALDH4A1
N-acetylglucosamine Degradation II	3.82E-01	2.5E-01		AMDHD2
Synaptic Long Term Depression	3.76E-01	1.34E-01	-2.357	PLCB1,NPR1,PLA2G16,PLCB2,MRAS,PPP2R3B,PLCE1,PLA2G7,PLCG2,PPP2R5A,PRKCA,MAP2K2,RARRES3,PRKCB,NOS3,HRAS,PLCL1,GNA15,LYN
Assembly of RNA Polymerase II Complex	3.55E-01	1.4E-01		POLR2L,POLR2E,POLR2F,POLR2C,POLR2I,GTF2A1,TAF5L
IL-15 Production	3.51E-01	1.48E-01		IRF3,JAK3,MST1R,FRK
Mitotic Roles of Polo-Like Kinase	3.46E-01	1.36E-01		TGFB1,PKMYT1,PPP2R5A,PPP2R3B,CDC20,PTTG1,CCNB2,ANAPC11,CDC25B
tRNA Splicing	3.44E-01	1.43E-01		PDE4A,PDE3B,PDE4B,TSEN15,PDE9A
Purine Nucleotides De Novo Biosynthesis II	3.41E-01	1.67E-01		ADSL,ADSS
Mineralocorticoid Biosynthesis	3.41E-01	1.67E-01		EBP,CYP21A2
BER pathway	3.41E-01	1.67E-01		LIG3,PARP1
G-Protein Coupled Receptor Signaling	3.33E-01	1.29E-01		PDE4A,PLCB2,PDE3B,MRAS,PIK3R5,NPY1R,NFKBIE,PDE4B,PRKACB,ADCY1,FYN,PIK3CD,MAP3K8,NFKBIB,RGS2,PRKCB,PRKAR1B,CREBBP,PRKAR2A,PLCB1,RAPGEF4,ADCY5,PTGER4,NPR3,ATF4,PRKCA,CREB3L4,MAP2K2,RASA1,HRAS,PDE9A,ADCY9,GNA15
Granzyme A Signaling	3.3E-01	1.5E-01		GZMA,CREBBP,NME1
Serine Biosynthesis	3.11E-01	2E-01		PSAT1
dTMP De Novo Biosynthesis	3.11E-01	2E-01		TYMS
Glutamate Degradation III (via 4-aminobutyrate)	3.11E-01	2E-01		ABAT
Folate Polyglutamylation	3.11E-01	2E-01		MTHFD1L
Acetate Conversion to Acetyl-CoA	3.11E-01	2E-01		ACSL1
Choline Biosynthesis III	3.02E-01	1.54E-01		PLD3,HMOX1
NAD Phosphorylation and Dephosphorylation	3.02E-01	1.54E-01		ACP6,ACP5
Glucocorticoid Biosynthesis	3.02E-01	1.54E-01		EBP,CYP21A2
Estrogen Biosynthesis	2.98E-01	1.35E-01		AKR1C3,HSD17B10,CYP4X1,HSD17B4,HSD17B7
Role of BRCA1 in DNA Damage Response	2.81E-01	1.28E-01	0.447	E2F4,RAD50,PBRM1,ARID2,E2F2,E2F1,BABAM1,FANCA,BARD1,RAD51
Chondroitin Sulfate Biosynthesis	2.79E-01	1.3E-01		CHST2,CHST3,B3GAT3,CHST1,CHST11,CHST12,CHPF
Chondroitin Sulfate Biosynthesis (Late Stages)	2.78E-01	1.3E-01		CHST2,CHST3,CHST1,CHST11,CHST12,CHPF
Superpathway of Citrulline Metabolism	2.67E-01	1.43E-01		ASS1,NOS3
Phenylalanine Degradation IV (Mammalian, via Side Chain)	2.67E-01	1.43E-01		SMOX,IL4I1
Colanic Acid Building Blocks Biosynthesis	2.67E-01	1.43E-01		PMM1,GALK1
Arginine Biosynthesis IV	2.57E-01	1.67E-01		ASS1
Pyruvate Fermentation to Lactate	2.57E-01	1.67E-01		LDHB
Urea Cycle	2.57E-01	1.67E-01		ASS1
Chondroitin and Dermatan Biosynthesis	2.57E-01	1.67E-01		CHPF
Pentose Phosphate Pathway (Non-oxidative Branch)	2.57E-01	1.67E-01		TKT
Glycerol Degradation I	2.57E-01	1.67E-01		GPD2
Selenocysteine Biosynthesis II (Archaea and Eukaryotes)	2.57E-01	1.67E-01		SARS2
UDP-N-acetyl-D-glucosamine Biosynthesis II	2.57E-01	1.67E-01		UAP1
Zymosterol Biosynthesis	2.57E-01	1.67E-01		HSD17B7
GDP-mannose Biosynthesis	2.57E-01	1.67E-01		PMM1
Leukotriene Biosynthesis	2.38E-01	1.33E-01		GGT5,GGT1
NAD Biosynthesis from 2-amino-3-carboxymuconate Semialdehyde	2.15E-01	1.43E-01		QPRT
Superpathway of Serine and Glycine Biosynthesis I	2.15E-01	1.43E-01		PSAT1
Phosphatidylcholine Biosynthesis I	2.15E-01	1.43E-01		CHKB
Inositol Pyrophosphates Biosynthesis	2.15E-01	1.43E-01		PPIP5K2
Glycoaminoglycan-protein Linkage Region Biosynthesis	2.15E-01	1.43E-01		B3GAT3
